# Supplementary material for: CHOmics: A web-based tool for multi-omics data analysis and interactive visualization in CHO cell lines
Source: PubMed Central journal article supplement (PMC7790544; doi:10.1371/journal.pcbi.1008498), 2020-12-22
Supplement: pcbi.1008498.s009.pdf [file pcbi.1008498.s009.pdf]

# CHomics Tutorial

Version 1.0, Feb, 2020

The screenshot displays the CHomics web application interface. At the top, there is a navigation bar with the following items: CHomics (v1), Toolbox, My Analyses, Admin, Projects (1), Comparisons (1), Samples (3), Hello, Demo User, and Sign Out. Below the navigation bar is a section titled "My Experiments and Analyses" with a "Hide" button. Underneath, there is a "Private Folder" path and a "Create New Experiment" button. A toggle switch is labeled "View NGS data in TPM (otherwise, in FPKM)". The main content area is divided into three panels: "CHO Demo" (dated 2019-10-10) with "Samples (2)" and "Analyses (1)", "RNA-Seq Data" (dated 2019-10-08) with "Samples (2)" and "Analyses (1)", and "Test" (dated 2019-10-11) with "Samples (0)" and "Analyses (0)". Below these panels are sections for "My Private Projects", "All Comparisons" (with a search bar), and "List of Comparisons". At the bottom, a footer indicates the application is powered by various technologies: CarveoPress.js, D3.js, Plotly.js, Highcharts.js, R, Bioconductor, HOMER, WikiPathways, KEGG, Reactome, and BioInfoX Application Platform.

<http://chomics.org>

user:demo@bioinforx.com

password:CHO\_demo

From the login page, you can use your email to register an account that is recommended, as you will be able to save results and upload your own data. Otherwise just use guest account to view public data.

## Contents

|                                                                      |    |
|----------------------------------------------------------------------|----|
| 1. Overview of CHOmics .....                                         | 4  |
| 1.1 Menu Bar .....                                                   | 4  |
| 1.2 Experiments and Analyses.....                                    | 4  |
| 1.3 Projects.....                                                    | 5  |
| 1.4 Samples .....                                                    | 5  |
| 1.5 Comparisons.....                                                 | 6  |
| 1.6 Genes.....                                                       | 8  |
| 2 Data Input .....                                                   | 9  |
| 2.1 Upload fastq files to experiment.....                            | 9  |
| 2.2 Upload data file to project .....                                | 10 |
| 3 Data Analysis.....                                                 | 12 |
| 3.1 RNAseq analysis pipeline.....                                    | 12 |
| 3.2 DE, GSEA and GO analysis .....                                   | 18 |
| 3.3 Saved Genes and Comparisons .....                                | 21 |
| 3.4 Advanced Analysis.....                                           | 23 |
| 3.3.1 Correlation Tools.....                                         | 23 |
| 3.3.2 PCA Analysis.....                                              | 24 |
| 3.3.3 Meta-Analysis.....                                             | 26 |
| 4 Visualization.....                                                 | 29 |
| 4.1 Visualize Gene Expression .....                                  | 29 |
| 4.1.1 View Gene Expression from multiple samples.....                | 29 |
| 4.1.2 View Gene Expression in Heatmap .....                          | 32 |
| 4.1.3 Multi-omics Expression View .....                              | 33 |
| 4.2 Visualize Comparison Data.....                                   | 34 |
| 4.2.1 Dashboard View of Comparison .....                             | 34 |
| 4.2.2 Bubble Plot.....                                               | 36 |
| 4.2.3 Get significant genes from comparisons.....                    | 41 |
| 4.2.4 Volcano Plot .....                                             | 44 |
| 4.3 Visualize functional pathway.....                                | 46 |
| 4.3.1 Enrichment from Up and Down Regulated Genes .....              | 46 |
| 4.3.2 View Changed Genes from a Functional Term in Volcano Plot..... | 47 |

|       |                                                              |    |
|-------|--------------------------------------------------------------|----|
| 4.3.3 | View Enriched Pathways Directly from Comparison Details..... | 49 |
| 4.3.4 | Multi-layer visualization.....                               | 50 |
| 4.3.5 | Pathway Heatmap From Comparisons.....                        | 54 |
| 5     | Customized analysis pipeline.....                            | 56 |
| 5.1   | Use alternative tool or algorithm.....                       | 56 |

# 1. Overview of CHOmics

There are several panels stacked in the main interface. The recent experiment and projects are listed in the panel separately for quick access. You can also access them and other functions from the shortcuts at the top menu bar.

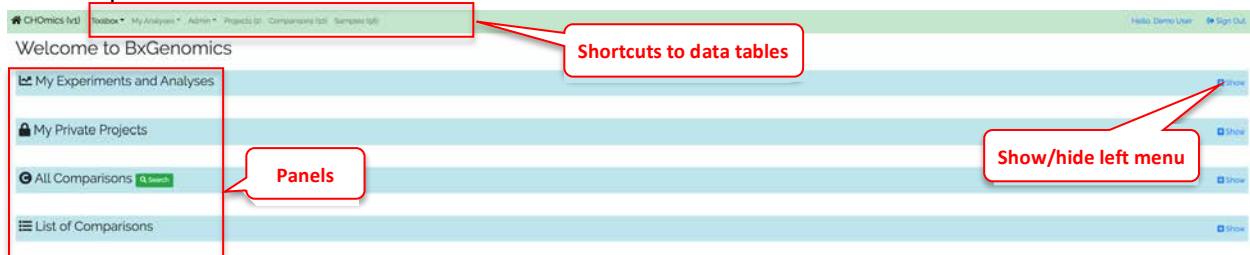

## 1.1 Menu Bar

In top menu bar, several shortcuts are listed for quick access of functions including: Toolbox, My Analysis, and Admin, Projects, Comparisons and Samples.

'Toolbox' contains a list of functional modules including: 'Import Project Data', 'Gene Expression Analysis', 'Comparison-based Analysis', 'Pathway Visualization' and 'Other tools'.

'My Analysis' provides quick access to the information of all 'Experiments', 'Samples' and 'Analysis'.

'Admin' allows the users to manage the data files from private folder, shared folder and overview the platforms applied to all data sets.

'Projects', 'Comparisons' and 'Samples' all provide searching function and access to specific project, comparison and sample respectively.

## 1.2 Experiments and Analyses

Experiment is designed for running the built-in RNA sequencing pipeline on the raw sequencing data. Once the experiment is created, users can upload raw fastq files and sample meta information, and then launch the built-in pipeline for analysis. After the analysis is completed, the analysis report is generated and the results can be exported as one 'Project' for visualization and cross-project comparison.

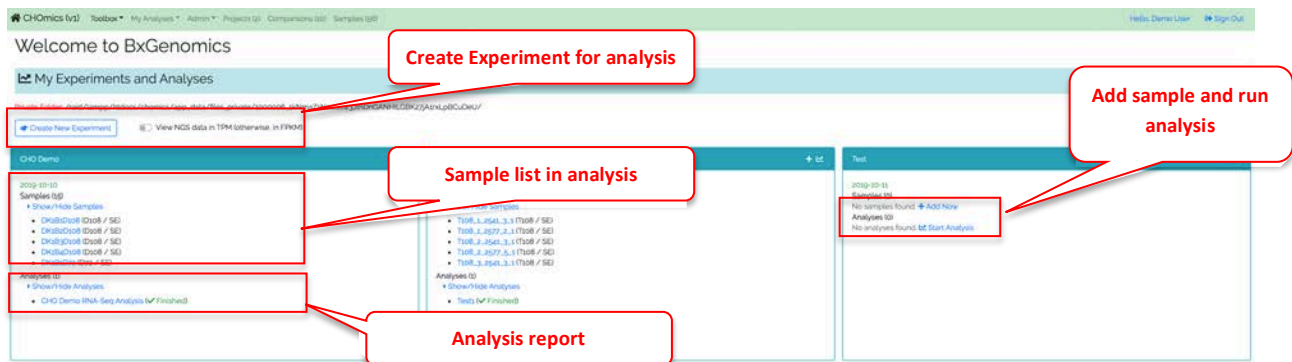

### 1.3 Projects

The project is used to perform data mining and data visualization. Users can either import analysis report from 'Experiment' or upload pre-processed data to create a project. In the project, users can easily explore different features of the data (e.g. Gene expression profiling, sample clustering, PCA, differential expression genes and pathways, etc), compare the analysis with the other projects or perform the meta-analysis by combining multiple projects.

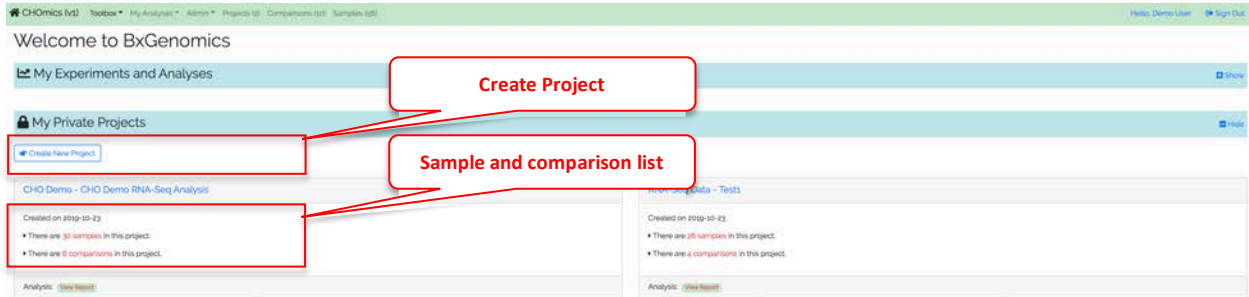

Each project mainly consists of samples including both meta information and omics profiling, and comparisons showing the statistical differences among samples.

### 1.4 Samples

A project may include many samples which can be searched by the 'Sample' in top menu bar. Each sample has its own properties including Species, CellType, DiseaseState, etc (details available by clicking the  button on the left ends).

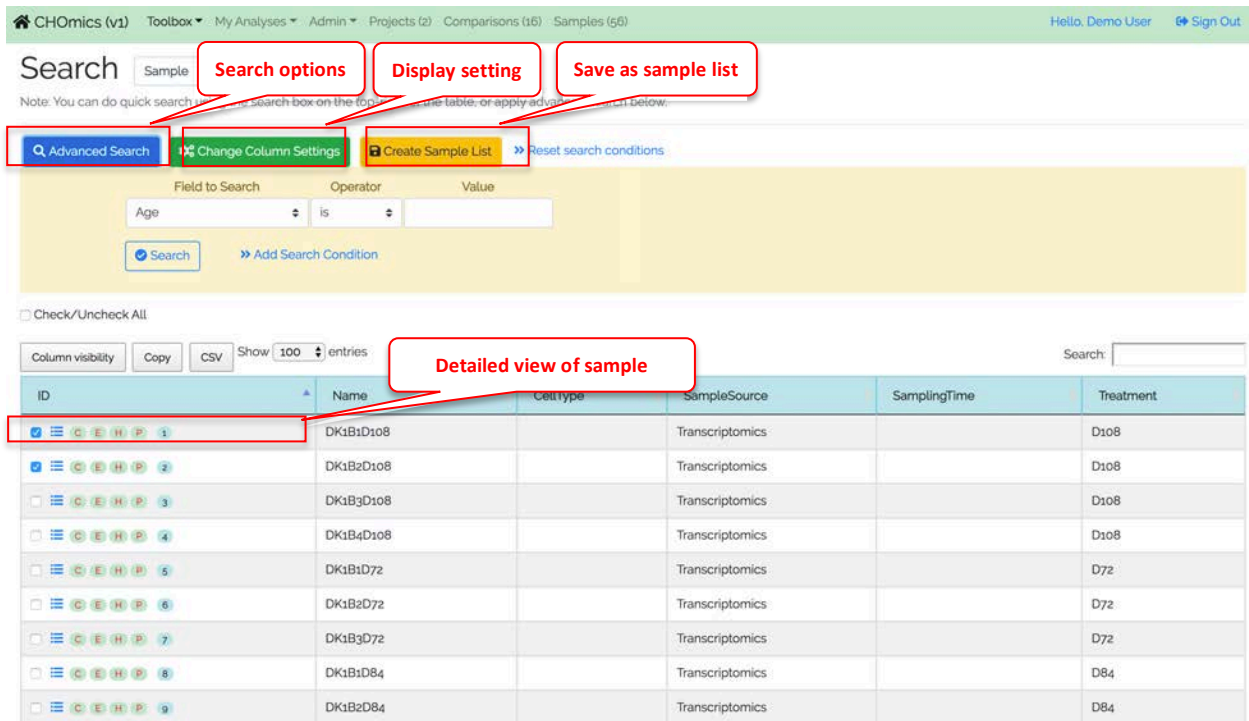

To change columns displayed in the table, using the table settings (green button). Users can also select the samples to save them into the sample list. Samples from the list can be loaded to other analysis or visualization stools like heatmap.

Each sample has a gene expression profile. In CHOmics, there are multiple ways to analyze and visualize the samples including: correlation tool (noted by 'C'), gene expression plot( noted by 'E'), expression heatmap (noted by 'H'), and PCA analysis (noted by 'P').

Sample: DK1B1D108

Found in project: CHO Demo - CHO Demo RNA-Seq Analysis

Found in comparisons: D108 vs D72, D108 vs D84, D108 vs Dg6

Tools for sample analysis:

- Gene Expression Correlation
- Gene Expression Plot
- Gene Expression Heatmap
- PCA Analysis

| Sample Details  |                                                 |                 |                 |
|-----------------|-------------------------------------------------|-----------------|-----------------|
| ID              | 1                                               | Projects ID     | 1               |
| Project Name    | CHO Demo - CHO Demo RNA-Seq Analysis            | Platforms ID    | 2               |
| Platform        | NGS_Mouse                                       | Platform Type   | NGS             |
| PlatformName    | Generic Mouse NGS Platform                      | Samples ID      | 27              |
| Species         | Mouse                                           | Name            | DK1B1D108       |
| Description     | CHO sample DK1-B1-D108, Time D108, Replicate B1 | SampleIndex     | 27              |
| CellType        |                                                 | DiseaseCategory |                 |
| DiseaseState    |                                                 | Ethnicity       |                 |
| Gender          |                                                 | Infection       |                 |
| Organism        |                                                 | Response        |                 |
| SamplePathology |                                                 | SampleSource    | Transcriptomics |

## 1.5 Comparisons

Comparison is defined by the comparative analysis between two groups of samples including differential gene analysis and pathway enrichment analysis.

There are a lot of meta data available for each comparison. See the dashboard for an overview of key categories, and the detailed description of each comparison has the full information.

CHOMics (v1) | Toolbox | My Analyses | Admin | Projects (2) | Comparisons (16) | Samples (56) | Hello, Demo User | Sign Out

Search: D84 vs D72

Note: You can do quick searches using the search box on the top right. For more options, click on the search box or apply advanced search filters.

Buttons: Advanced Search, Change Column Settings, Create Comparison List, Create a Sample List, Reset search conditions

Check/Uncheck All

Column visibility | Copy | CSV | Show

Search:

| ID                                                    | Name        | Case SampleIDs | Control SampleIDs |
|-------------------------------------------------------|-------------|----------------|-------------------|
| <input checked="" type="checkbox"/> B M H C V W R K 1 | D84 vs D72  | Show/Hide      | Show/Hide         |
| <input checked="" type="checkbox"/> B M H C V W R K 2 | D96 vs D72  | Show/Hide      | Show/Hide         |
| <input type="checkbox"/> B M H C V W R K 3            | D108 vs D72 | Show/Hide      | Show/Hide         |
| <input type="checkbox"/> B M H C V W R K 4            | D96 vs D84  | Show/Hide      | Show/Hide         |
| <input type="checkbox"/> B M H C V W R K 5            | D108 vs D84 | Show/Hide      | Show/Hide         |
| <input type="checkbox"/> B M H C V W R K 6            | D108 vs D96 | Show/Hide      | Show/Hide         |

The selected comparisons can be saved to the comparison list (yellow button) for easy loading into the plotting tools.

Several options on each comparison for complicated visualization and analysis are also listed including: bubble plot of gene expressions (noted by 'B'), meta analysis (noted by 'M'), pathway heatmap plot (noted by 'H'), significant changes genes (noted by 'C'), volcano plot (noted by 'V'), Wikipathway mapping (noted by 'W'), and Rectome and KEGG pathway mapping (noted by 'R' and 'K' respectively).

CHOMics (v1) | Toolbox | My Analyses | Admin | Projects (2) | Comparisons (16) | Samples (56) | Hello, Demo User | Sign Out

Comparison: D84 vs D72

Search All Comparisons | View Comparison Genes | Edit Comparison Details

| ID | Name       | Project                              | Category | DiseaseState    | Tissue         | Samples   | Control Samples |
|----|------------|--------------------------------------|----------|-----------------|----------------|-----------|-----------------|
| 1  | D84 vs D72 | CHO Demo - CHO Demo RNA-Seq Analysis |          | Unknown Disease | Unknown Tissue | Show/Hide | Show/Hide       |

Buttons: View Details, Genes, Changed Genes, WikiPathways, Reactome Pathways, KEGG Pathways, Pathway Heatmap, Bubble Plot, Meta Analysis, Volcano Chart

Options for comparison analysis and visualization

Up Regulated Genes

Biological Process

Cellular Component

Molecular Function

KEGG

Molecular Signature

Interpro Protein Domain

Wiki Pathway

Reactome

Enrichment Report

Biological Process

| Biological Process                   | Number of Genes | log(p) |
|--------------------------------------|-----------------|--------|
| RNA processing                       | ~100            | -45.96 |
| metabolic process                    | ~550            | -40.66 |
| organic substance metabolic process  | ~500            | -40.11 |
| ribonucleoprotein complex biogenesis | ~100            | -39.52 |
| primary metabolic process            | ~500            | -39.29 |
| macromolecule metabolic process      | ~450            | -36.94 |
| nitrogen compound metabolic process  | ~500            | -36.83 |
| ribosome biogenesis                  | ~100            | -36.79 |
| cellular metabolic process           | ~550            | -36.79 |
| ncRNA processing                     | ~100            | -35.26 |

## 1.6 Genes

The genome-wide gene expression values were detected in each sample using RNA-Seq or microarrays. All the human genes that have expression values are listed in gene table. The gene annotation from difference platforms were all mapped to NCBI gene ID (EntrezID) for consistence across platforms.

| ID      | GeneName | EntrezID  | Source                 | Alias   |
|---------|----------|-----------|------------------------|---------|
| Gm13461 | Gm13461  | 75242     | Ensembl_mouse_gene_v94 | Gm13461 |
| Gm18206 | Gm18206  | NA        | Ensembl_mouse_gene_v94 | NA      |
| Xln4    | Xln4     | 457097    | Ensembl_mouse_gene_v94 | Xln4    |
| Gm18928 | Gm18928  | 10544937  | Ensembl_mouse_gene_v94 | Gm18928 |
| Gm17380 | Gm17380  | NA        | Ensembl_mouse_gene_v94 | NA      |
| Gm17353 | Gm17353  | NA        | Ensembl_mouse_gene_v94 | NA      |
| Gm17588 | Gm17588  | NA        | Ensembl_mouse_gene_v94 | NA      |
| Gm19298 | Gm19298  | 100038275 | Ensembl_mouse_gene_v94 | Gm19298 |
| Gm17329 | Gm17329  | NA        | Ensembl_mouse_gene_v94 | NA      |
| Gm17341 | Gm17341  | 654792    | Ensembl_mouse_gene_v94 | Gm17341 |
| Gm19148 | Gm19148  | NA        | Ensembl_mouse_gene_v94 | NA      |
| Gm19238 | Gm19238  | 100038274 | Ensembl_mouse_gene_v94 | Gm19238 |
| Gm19268 | Gm19268  | 100038273 | Ensembl_mouse_gene_v94 | Gm19268 |
| Gm19395 | Gm19395  | NA        | Ensembl_mouse_gene_v94 | NA      |
| Gm17396 | Gm17396  | NA        | Ensembl_mouse_gene_v94 | NA      |
| Gm17381 | Gm17381  | NA        | Ensembl_mouse_gene_v94 | NA      |
| Gm16501 | Gm16501  | 492876    | Ensembl_mouse_gene_v94 | Gm16501 |
| Rpl1    | Rpl1     | 19888     | Ensembl_mouse_gene_v94 | Rpl1    |
| Gm17483 | Gm17483  | NA        | Ensembl_mouse_gene_v94 | NA      |
| Sca17   | Sca17    | 20671     | Ensembl_mouse_gene_v94 | Sca17   |
| Gm17387 | Gm17387  | NA        | Ensembl_mouse_gene_v94 | NA      |

To find a gene, you can use gene symbol, gene description, gene alias, NCBI gene ID, Ensembl gene ID or Uniprot ID.

For some common genes, the symbols used in publications are often not the official symbol, and you can try search alias field. For example, TP53 is often referred to as P53 in publication. You need to search P53 in alias or tumor protein p53 in description to find it if you don't know its official symbol.

The NCBI Gene search <https://www.ncbi.nlm.nih.gov/gene> is a good source to get official gene symbols and IDs.

You can view full details of a gene by clicking the  button .



Gene: Gm18956

» Search All Genes

Gene Expression Plot Gene Bubble Plot

**View expression plot**

**View Bubble plot across comparisons**

| Gene Details |                       |                  |                        |
|--------------|-----------------------|------------------|------------------------|
| ID           | 10000003              | Species          | Mouse                  |
| GeneIndex    | 10000003              | GeneName         | Gm18956                |
| EntrezID     | 100418032             | Source           | Ensembl_mouse_gene_v94 |
| Description  | predicted gene, 18956 | Alias            | Gm18956                |
| Ensembl      | ENSMUSG00000102851    | Unigene          | NA                     |
| Uniprot      | NA                    | TranscriptNumber | 1                      |
| Strand       | +                     | Chromosome       | 1                      |
| Start        | 3252757               | End              | 3253236                |
| ExonLength   | 480                   | GeneID           | Gm18956                |
| AccNum       | NA                    | Biotype          | processed_pseudogene   |

From gene details, you can access RNA-Seq data in a box plot, or view all comparisons including this gene in a bubble plot.

## 2 Data Input

### 2.1 Upload fastq files to experiment

After the experiment is created, users can upload fastq or fastq.gz files through remote URLs, server files or local files. The files are uploaded to the private folder named 'Experiments' automatically.

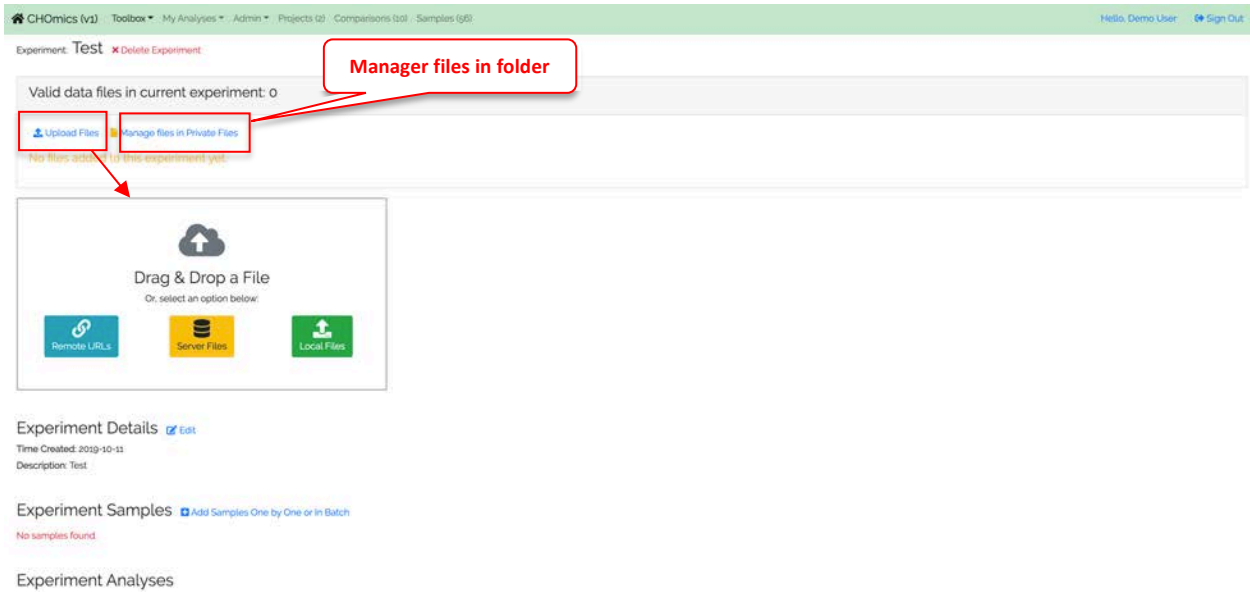

In the folder 'Experiments', there may be multiple subfolders corresponding to different experiments. Users can easily modify the folder or upload new files to the folder.

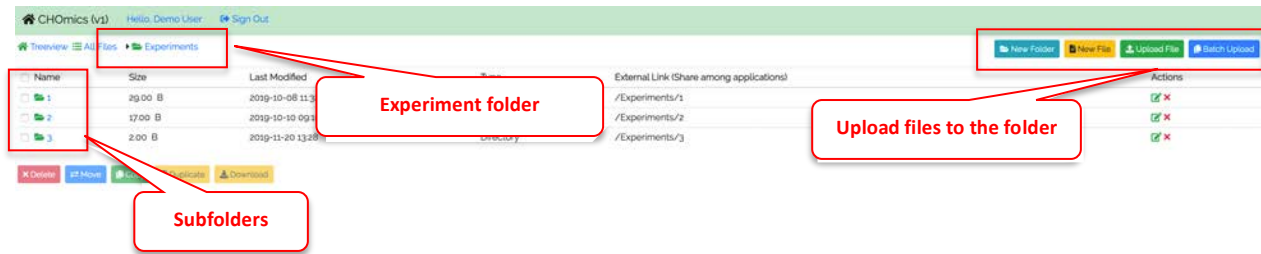

## 2.2 Upload data file to project

Besides raw RNA sequencing data (fastq files), CHOmics also allow the input of other types of data to start a project, including meta data (i.e. project and samples), expression data, and summary data. Those data should be uploaded in comma separated values (CSV) or tab separated values (TSV) with either

fixed or flexible format.

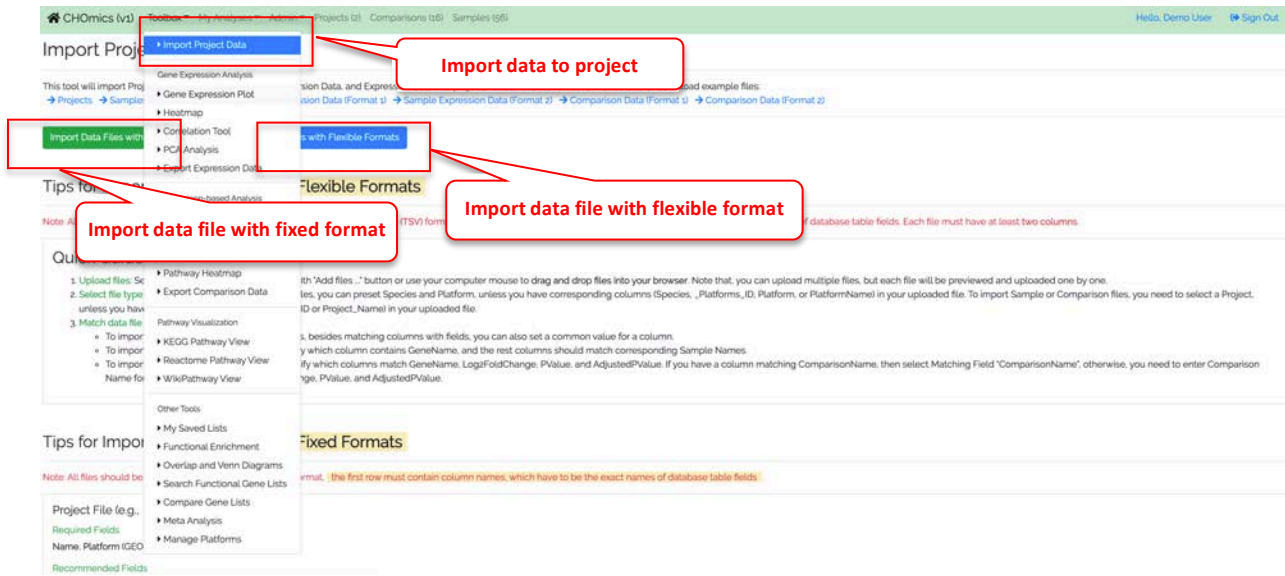

Project file can be uploaded to create a new project. The project file contains some required information such as Name, Platform and other optional fields such as Disease, Description etc.

Sample file can be uploaded to register samples for a project. The sample file contains required information such as Name and Project\_Name and optional fields such as Description, Tissue, DiseaseState, SampleSource, Gender, etc.

Expression file can be uploaded with quantified expression measure at gene level. The expression could be transcriptomics, proteomics or other gene-level counts. The file is required to contain GeneName, SampleName, Value.

Comparison file and Comparison data file are used to upload summary results for statistical comparison test applied externally. Comparison file needs to contain the Project\_Name, Case\_SampleIDs, and Control\_SampleIDs while comparison data file contains statistical results such as GeneName, ComparisonName, Log2FoldChange, PValue, Adjusted PValue for each comparison.

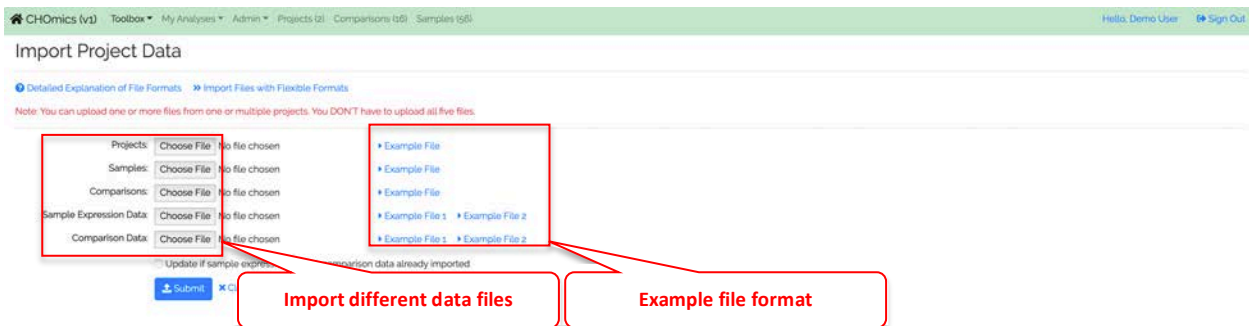

### 3 Data Analysis

#### 3.1 RNAseq analysis pipeline

After fastq files are uploaded to the experiment by following the Section 2.1, users can start the analysis by applying the built-in pipeline mainly including: Raw Data QC (quality control), Alignment, Gene Counts and QC, and DEG, GSEA and GO analysis. After the analysis is completed, the results can be exported into a project for visualization.

After completion of each step, a report is generated for summarizing the metrics in each step to quantify raw data QC, alignment with Subread method, and gene count distribution and sample/gene count QC, respectively.

In the report for raw data QC, all fastq files are verified in quality by software fastQC. Sequencing read information and quality control metrics are summarized for each individual fastq file.

| Filename                                               | Total Sequences | Sequences flagged as poor quality | Sequence length | %GC | #Total Duplicated Percentage |
|--------------------------------------------------------|-----------------|-----------------------------------|-----------------|-----|------------------------------|
| NG-7391_Tg6_4_RNA20140328RA_IB44118_2577_2_1.fastq.gz  | 3223065         | 0                                 | 51              | 52  | 47.2%                        |
| NG-7391_T108_1_RNA20140328RA_IB44119_2541_3_1.fastq.gz | 2763635         | 0                                 | 51              | 55  | 50.0%                        |
| NG-7391_T72_1_RNA20140328RA_IB44108_2577_5_1.fastq.gz  | 4783635         | 0                                 | 51              | 53  | 42.7%                        |
| NG-7391_T108_4_RNA20140328RA_IB44122_2577_2_1.fastq.gz | 3215429         | 0                                 | 51              | 53  | 46.6%                        |
| NG-7391_T84_1_RNA20140328RA_IB44111_2541_3_1.fastq.gz  | 2500801         | 0                                 | 51              | 53  | 53.3%                        |
| NG-7391_T84_4_RNA20140328RA_IB44114_2577_2_1.fastq.gz  | 29244828        | 0                                 | 51              | 52  | 48.7%                        |

The table below show pass/fail for several QC metrics. Click the file name to open individual reports. You can view fastQC documentation to get more information about the QC metrics.

Please note that for RNA-Seq data, it is normal to observe a few failed metrics, which usually will not affect subsequent data analysis. First, per base sequence content (and Kmer content) will often fail fastQC due to non-random base content at the first ~12 bases. This is because the random primers used during reverse transcription step are actually not totally random in terms of base content. Second, the sequence duplication levels of RNA-Seq data are usually high because many transcripts are highly expressed.

QC metrics

| File Name                                                               | Basic Statistics | Per base sequence quality | Per tile sequence quality | Per sequence quality scores | Per base sequence content | Per sequence GC content | Per base N content | Sequence Length Distribution | Sequence Duplication Levels | Overrepresented sequences | Adapter Content |
|-------------------------------------------------------------------------|------------------|---------------------------|---------------------------|-----------------------------|---------------------------|-------------------------|--------------------|------------------------------|-----------------------------|---------------------------|-----------------|
| <a href="#">NG-7391_Tp6_4_RNA20140328RA_lib44118_2577_2_1.fastq.gz</a>  | PASS             | PASS                      | WARN                      | PASS                        | FAIL                      | PASS                    | PASS               | PASS                         | FAIL                        | WARN                      | PASS            |
| <a href="#">NG-7391_T108_1_RNA20140328RA_lib44119_2541_3_1.fastq.gz</a> | PASS             | PASS                      | PASS                      | PASS                        | FAIL                      | WARN                    | PASS               | PASS                         | WARN                        | FAIL                      | PASS            |
| <a href="#">NG-7391_T72_1_RNA20140328RA_lib44108_2577_5_1.fastq.gz</a>  | PASS             | PASS                      | WARN                      | PASS                        | FAIL                      | PASS                    | PASS               | PASS                         | FAIL                        | PASS                      | PASS            |
| <a href="#">NG-7391_T108_4_RNA20140328RA_lib44122_2577_2_1.fastq.gz</a> | PASS             | PASS                      | WARN                      | PASS                        | FAIL                      | PASS                    | PASS               | PASS                         | FAIL                        | PASS                      | PASS            |
| <a href="#">NG-7391_T84_1_RNA20140328RA_lib44111_2541_3_1.fastq.gz</a>  | PASS             | PASS                      | PASS                      | PASS                        | FAIL                      | PASS                    | PASS               | PASS                         | WARN                        | WARN                      | PASS            |
| <a href="#">NG-7391_T84_4_RNA20140328RA_lib44134_2577_2_1.fastq.gz</a>  | PASS             | PASS                      | WARN                      | PASS                        | FAIL                      | PASS                    | PASS               | PASS                         | FAIL                        | WARN                      | PASS            |

In the report for alignment, parameter setting and quality metrics (e.g, mapped, junctions,etc) for alignment are listed for each fastq file.

CHOmics (v1) | Toolbox | My Analyses | Admin | Projects (2) | Comparisons (16) | Samples (56) | Hello, Demo User | Sign Out

## BxGenomics - Sequence Alignment Logs

Subread: v1.5.0-p1 (<http://subread.sourceforge.net/>)

### Subjunc Settings

```

Function : Read alignment + Junction detection (RNA-Seq)
Threads : 6
Input file : /raid/lampp/htdocs/chomics/app_data/analysis/2_yr ...
Output file : /raid/lampp/htdocs/chomics/app_data/analysis/2_yr ...
Index name : /var/www/html/cho_genomics/app_data/files_core/PI ...
Phred offset : 33

Min votes : 1 / 14
Allowed mismatch : 3 bases
Max indels : 5
# of Best mapping : 1
Unique mapping : no
Hamming distance : no
Quality scores : no

Summary:

Processed : 27636352 reads
Mapped : 26781244 reads (96.9%)
Junctions : 111928
Indels : 46843

Running time : 12.6 minutes
    
```

In the report for Gene Counts and QC step, several metrics have been calculated and plotted for comprehensive evaluation of genes and samples, including: reads mapping to genes, distribution of detected genes, percentage of reads for highly expressed genes, normalization and boxplot of gene expression, sample grouping and clustering, sample correlation and outlier detection.

'1. Assign reads to genes' plots the mapping summary of reads to genes, showing the percentage of reads assigned to genes or unassigned due to unmapping, no features or ambiguous mapping.

## BxGenomics - RNA-Seq QC Report

### 1. Assign Reads to Genes

The alignment bam files were compared against the gene annotation GFF file, and raw counts for each gene were generated using the `featureCounts` tool from subread. The graph below shows mapping and gene assignment summary. Click the graph to download the pdf version. You can also [download the csv file that contains the numbers](#).

- [Download the raw gene counts in CSV format](#). This file lists the number of reads mapped to each gene.

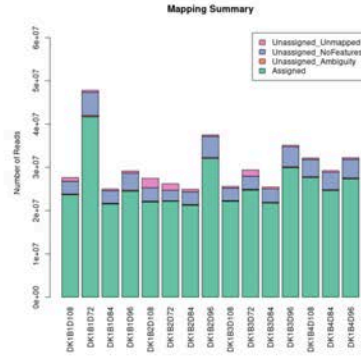

It is normal to observe some variation in number of reads across samples. However, samples with extremely low number of reads may not be suitable for downstream analysis, and we recommend checking the additional QC metrics below to identify potential outliers to exclude from downstream analysis.

‘2. Number of Genes Detected’ plots the number of expressed genes with read count from intervals of  $\geq 1$ ,  $\geq 2$ ,  $\geq 10$ ,  $\geq 50$  and  $\geq 100$ .

‘3. Percentage Reads from Most Highly Expressed Genes’ plots the percentage of reads mapped to the top expressed genes (up to 100 genes).

## 2. Number of Genes Detected

Next, we performed additional QC at gene level. We first looked at number of genes detected. We count the number of genes that have at least 1, 2, 10, 50 or 100 counts. In general, number of genes with 2 or more counts can be used as a rough estimate of how many genes are expressed. Genes with only 1 read could be noise. In addition, the number of genes with 10 or more reads is a good indicator of how many genes have enough reads for downstream statistical analysis. Click the graph to download a pdf version, you can also download a csv file [containing the numbers](#).

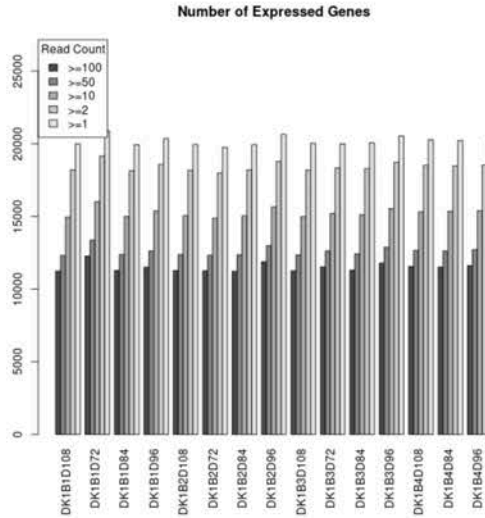

We also try to detect outliers from this step. Any samples that show very small number of genes with 10 or more reads are potential outliers. The cutoff we used is 1/2 of the median across all samples.

## 3. Percentage Reads from Most Highly Expressed Genes

We also look at the percentage of reads belonging to the top genes. Basically we rank the genes by read counts, and compute the percentage of reads belonging to the top genes (up to top 100).

If majority of the reads come from top genes, then the sample probably has bottlenecking issues where a few genes were amplified many times by PCR during library preparation.

Most samples should have ~ 20% reads mapped to the top 100 genes.

If the top 100 genes account for more than 35% of all reads, we consider this sample as a potential outlier.

Click the graph to download a pdf version. You can also download a csv file [download the csv file that contains the numbers](#).

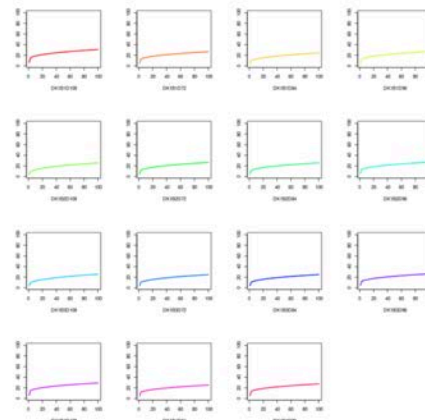

'4. Normalization and Boxplot of Gene Expression' evaluates gene expression after normalization by TMM method and then draws boxplot of normalized expression (logCPM: log of counts per million reads) after log<sub>2</sub> transformation.

## 4. Normalization and Boxplot of Gene Expression

The raw counts data were further processed by the following steps:

a) Remove genes that were not expressed. If a gene has counts per million (CPM) value  $>-1$  in at least two of the samples, we consider it expressed in the experiment and include it for downstream QC analysis. From 32871 total genes, 14212 genes are selected as expressed and used in downstream QC analysis.

b) The [TMM normalization method](#) was used to scale samples to remove differences in the composition of the RNA population between samples. It is performed with the [edgeR package](#). The normalization factors for all samples are listed below. You can [download the csv file](#).

| Name      | group | lib.size | norm.factors |
|-----------|-------|----------|--------------|
| DK1B1D108 | 1     | 23619476 | 0.927        |
| DK1B1D72  | 1     | 41669151 | 1.010        |
| DK1B1D84  | 1     | 21522805 | 1.028        |
| DK1B1Dg6  | 1     | 24476888 | 0.995        |

At this step, we also try to identify outliers that have extreme normalization factors ( $>1.5$  or  $<0.66$ ). Note sometimes samples with large biological differences can have extreme normalization factors.

c) The normalized gene counts were transformed to log<sub>2</sub> scale using [voom method](#) from the [R Limma package](#). We created boxplot for each sample to summarize gene expression.

Since this is normalized data, most samples should look similar. Samples with high or low distribution may be outliers (or have large biological differences).

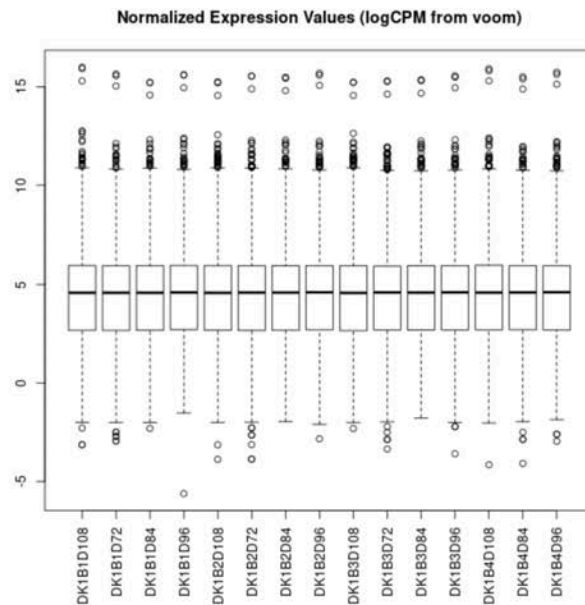

‘5 Grouping and Clustering of Samples’ plots the relationship among samples by multidimensional scale. Samples are clustered by hierarchical clustering method based on the expression of top genes with large variation ( $SD/mean > 0.3$ ).



## 5. Grouping and Clustering of Samples

a) We first create multidimensional plot to view sample relationships. This is done using [R Limma package](#).

Here biological replicates should cluster together, and difference conditions ideally should separate from each other.

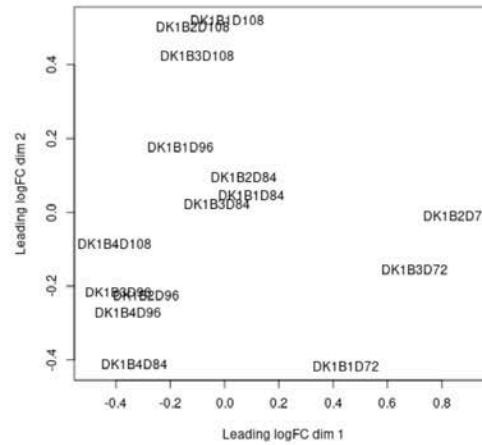

b) Very often hierarchical clustering can give better indication of the sample and gene relationships. We used [made4 package](#) from R to cluster samples and draw a heatmap.

We selected genes that have variable expression across samples to make the heatmap. These variable genes were chosen based on standard deviation (SD) of expression values larger than 30% of the mean expression values (Mean). If there are more than >5000 variable genes, we first remove genes with mean logCPM<1, then rank genes by SD/Mean to get the top 5000 genes.

The heatmap is created from 1124 variable genes.

In the heatmap above, we selected genes that changed across samples (normally by SD/mean > 0.3), and plotted the relatively gene expression levels (blue is low, red is high). Gene names are not shown due to large number of genes used to create the heatmap. Both genes and samples are clustered in the heatmap. Normally biological replicates should cluster together, and ideally there should be up- or down- regulated genes between different conditions.

Heatmap can be used to detect overall patterns, as well as outlier samples.

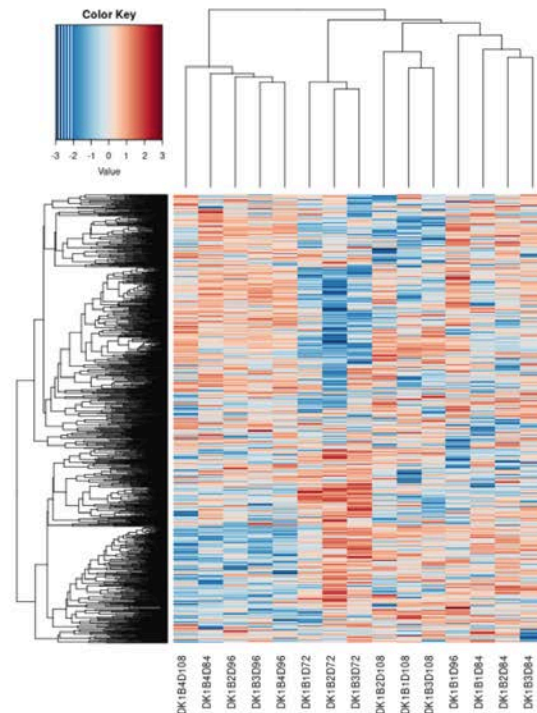

‘6 Sample correlation’ creates scatter plots for the correlation between sample pairs. The idea is that biological replicates from the same group should look similar in the scatter plot, and should have high correlation values compared to the samples from other groups.

## 6. Sample correlation

We also created scatter plots for the correlation between sample pairs. If there are many samples, you may need to download the graph and view it at full size. Again, the idea here is that biological replicates should look similar in the scatter plot, and should have high correlation values.

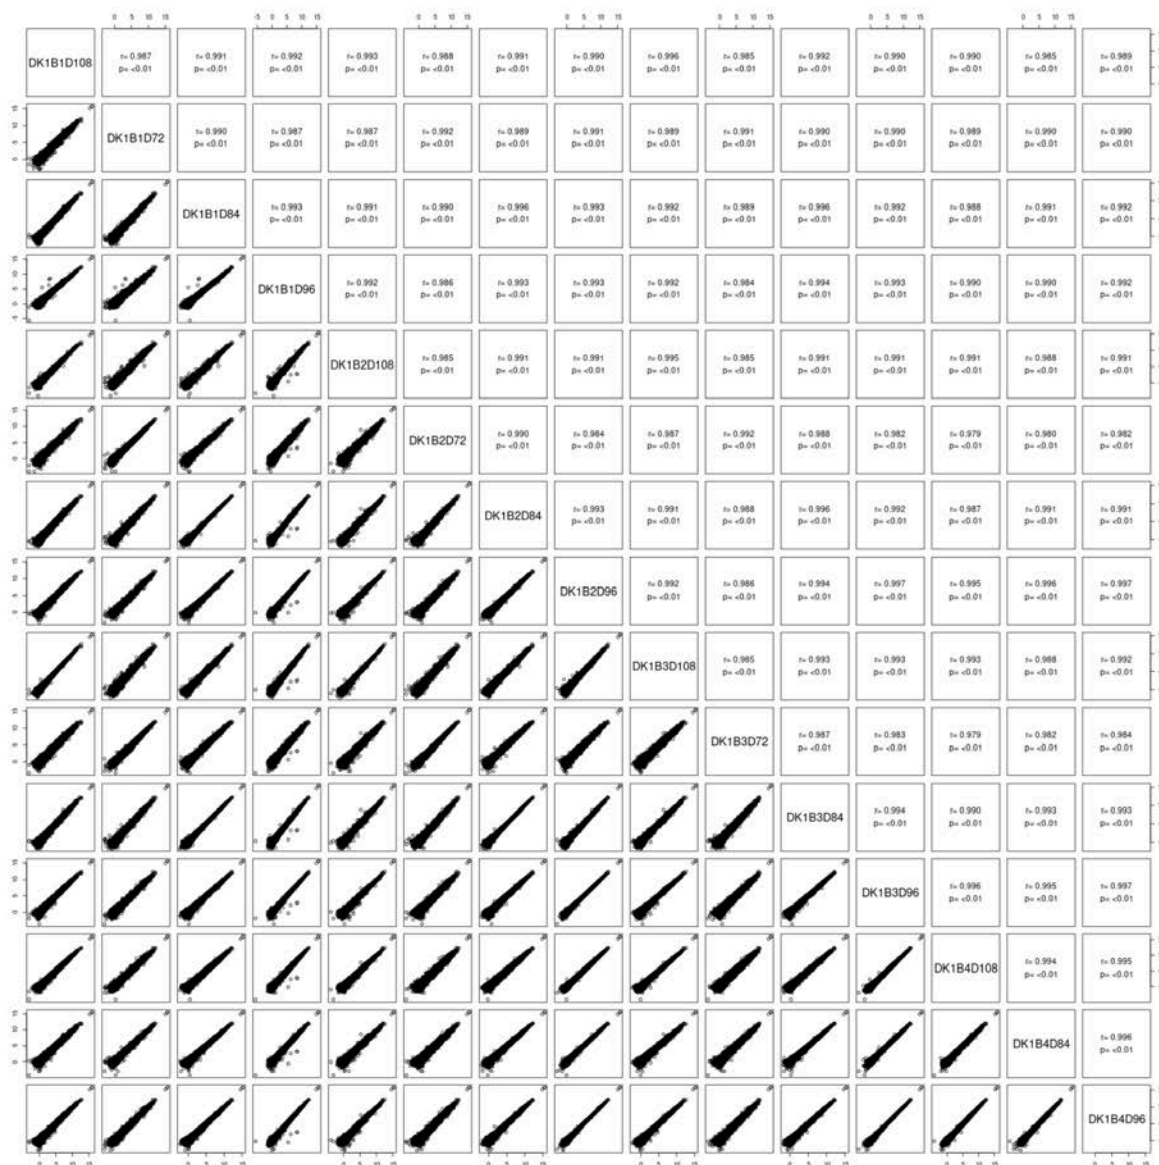

## 3.2 DE, GSEA and GO analysis

After completing the first three steps for sample quality control and gene count readout, users can start statistical analysis as the last step of pipeline, including differential expression analysis (DEG), gene set enrichment analysis (GSEA) and gene ontology (GO) analysis.

DEG analysis is applied to compare gene expression between two groups, namely comparison. Users can design one or multiple comparisons for DEG analysis. In each comparison, differential expressed genes are identified by LIMMA model, followed by GSEA pathway analysis and GO enrichment analysis which explore the enrichment of DEGs in diverse pathways.

CHomics (v1) | Toolbox | My Analyses | Admin | Projects (0) | Comparisons (0) | Samples (0) | Hello, Demo User | Sign Out

Analysis: Test | Delete Analysis

Analysis Details | Edit Analysis Details

Experiment: CH10 Demo  
Time Created: 2019-11-22 08:51:10  
Name: Test  
Description: INCEL set

Analysis Samples | Data Type: PD  
15 samples are used | Show All Samples | Select Samples and Files | Create Sample

Analysis Steps and Progress

Tip: Please select one or multiple analysis steps to get started

| Run Complete Analysis             | Status      | Step Files  |
|-----------------------------------|-------------|-------------|
| Step 1: Raw Data QC               | Not Started | Not Started |
| Step 2: Alignment with Subread    | Not Started | Not Started |
| Step 3: Gene Counts and QC        | Not Started | Not Started |
| Step 4: DEG, GSEA and GO Analysis | Not Started | Not Started |

DEG Parameters

Use TMM Normalization:  True

Minimum number of Genes in a set:

Maximum number of Genes in a set:

Select Comparisons:

|     |    |     |
|-----|----|-----|
| D1a | vs | D1b |
| D1c | vs | D1d |
| D1e | vs | D1f |
| D1g | vs | D1h |
| D1i | vs | D1j |
| D1k | vs | D1l |
| D1m | vs | D1n |
| D1o | vs | D1p |

[Add Comparison](#)

[Submit Analysis Job](#)

The reports for DEG and pathway analysis are attached for each comparison after completion of analysis.

CHomics (v1) | Toolbox | My Analyses | Admin | Projects (0) | Comparisons (0) | Samples (0) | Hello, Demo User | Sign Out

Analysis: Test | Delete Analysis

Analysis Details | Edit Analysis Details

Experiment: CH10 Demo  
Time Created: 2019-11-22 08:51:10  
Name: Test  
Description: INCEL set

Analysis Samples | Data Type: PD  
15 samples are used | Show All Samples | Select Samples and Files | Create Sample

Analysis Steps and Progress

Tip: Please select one or multiple analysis steps to get started

| Run Complete Analysis             | Status   | Step Files  |
|-----------------------------------|----------|-------------|
| Step 1: Raw Data QC               | Finished | Not Started |
| Step 2: Alignment with Subread    | Finished | Not Started |
| Step 3: Gene Counts and QC        | Finished | Not Started |
| Step 4: DEG, GSEA and GO Analysis | Finished | Not Started |

Report for DEG, GSEA and GO analysis

- DEG vs D1a
- DEG vs D1b
- DEG vs D1c
- DEG vs D1d
- DEG vs D1e
- DEG vs D1f
- DEG vs D1g
- DEG vs D1h
- DEG vs D1i
- DEG vs D1j
- DEG vs D1k
- DEG vs D1l
- DEG vs D1m
- DEG vs D1n
- DEG vs D1o
- DEG vs D1p
- GSEA Analysis Report
- GO Enrichment Analysis Report

In the report for DEG analysis, the table summarizing DEGs with up- and down-regulation is listed along with a heatmap clustering the DEGs expression (up to top 1000 DEGs).

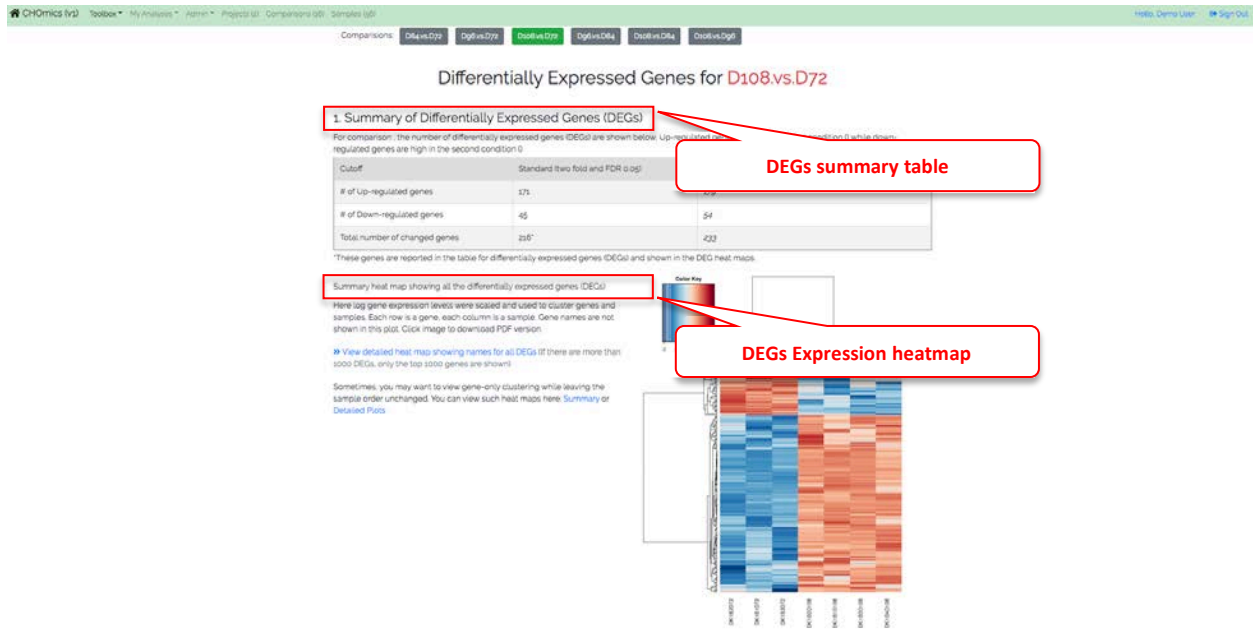

In the report for GO enrichment analysis, barplots show the significance of enrichment of up- or down-regulated DEGs in different pathway databases, e.g, GO, KEGG, Wiki pathways, etc.

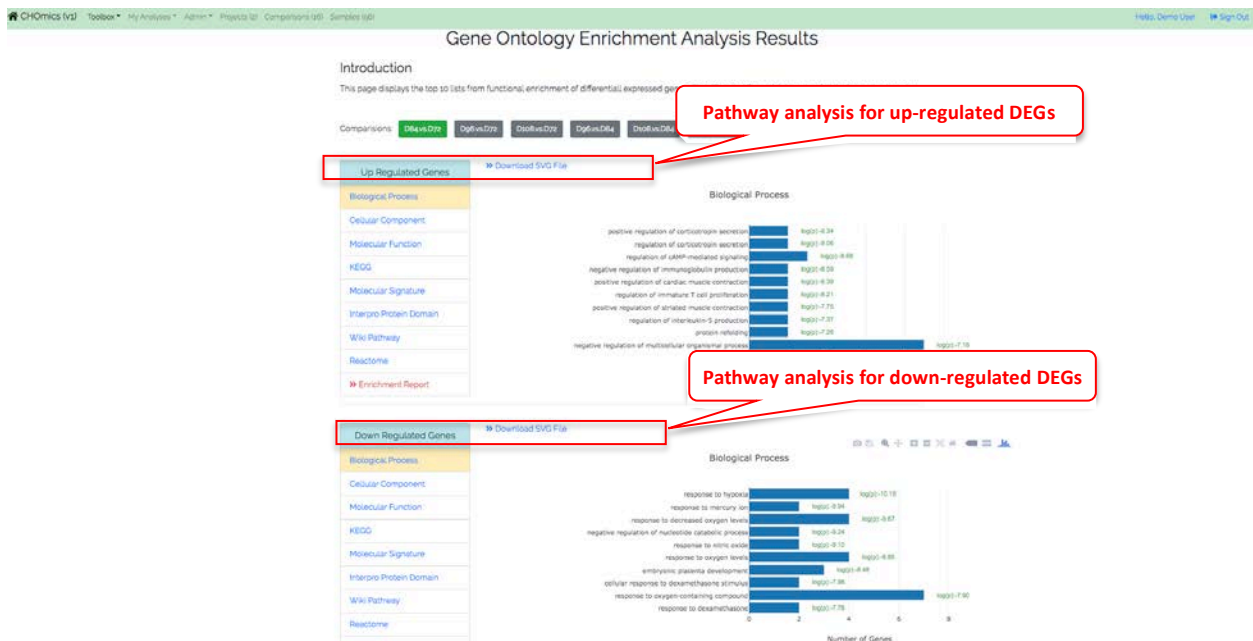

Similarly, in the report for GSEA analysis, enrichment results for up- and down-regulated DEGs in pathways from MigDB database are plotted with significance level (FDR), respectively.





Submit Start Over

**4. Save comparison list**

Save Comparison List Bubble Plot Pathway Heatmap Meta Analysis Export Comparison Data WikiPathways Reactome Pathways KEGG Pathways

Save Gene List Gene Expression Plot Heatmap Correlation Tool PCA Analysis Export Expression Data

Column visibility Copy

**6. Save gene list**

Showing 1 to 10 of 40 entries Search

| GeneName | Description                                              | D84 vs D72 - Log2FC | D84 vs D72 - PValue | D84 vs D72 - FDR | D96 vs D72 - Log2FC | D96 vs D72 - PValue | D96 vs D72 - FDR | D108 vs D72 - Log2FC | D108 vs D72 - PValue | D108 vs D72 - FDR |
|----------|----------------------------------------------------------|---------------------|---------------------|------------------|---------------------|---------------------|------------------|----------------------|----------------------|-------------------|
| Adm      |                                                          | -1.0525             | 0.0000              | 0.0008           | -1.3096             | 0.0000              | 0.0001           | -1.3009              | 0.0000               | 0.0022            |
| Aqpt     |                                                          | -1.4112             | 0.0000              | 0.0000           | -1.6577             | 0.0000              | 0.0000           | -1.5824              | 0.0000               | 0.0000            |
| Arhgef37 | Rho guanine nucleotide exchange factor (GEF) 37          | -1.2755             | 0.0000              | 0.0024           | -1.3097             | 0.0000              | 0.0002           | -1.6978              | 0.0000               | 0.0002            |
| Calcr    | calcitonin receptor                                      | 1.3005              | 0.0001              | 0.0071           | 1.9313              | 0.0000              | 0.0001           | 2.2895               | 0.0000               | 0.0000            |
| Capn8    | calpain 8                                                | 1.1739              | 0.0002              | 0.0088           | 1.4216              | 0.0000              | 0.0011           | 1.1208               | 0.0016               | 0.0204            |
| Cdhr17   | cadherin 17                                              | 2.1087              | 0.0008              | 0.0192           | 2.6875              | 0.0000              | 0.0009           | 2.8232               | 0.0000               | 0.0006            |
| Cdkn1c   | cyclin-dependent kinase inhibitor 1C (p57)               | -1.1140             | 0.0001              | 0.0051           | -1.5953             | 0.0000              | 0.0005           | -1.4709              | 0.0000               | 0.0010            |
| Celf5    | CUGBP, Elav-like family member 5                         | 1.4453              | 0.0006              | 0.0173           | 1.4787              | 0.0015              | 0.0140           | 1.9500               | 0.0059               | 0.0479            |
| Chad     | chondroadherin                                           | 1.2709              | 0.0001              | 0.0067           | 1.7458              | 0.0000              | 0.0003           | 1.7059               | 0.0001               | 0.0024            |
| Crispld2 | cysteine-rich secretory protein LCCL domain containing 2 | 1.8740              | 0.0023              | 0.0345           | 1.3480              | 0.0022              | 0.0181           | 1.9423               | 0.0004               | 0.0087            |

Showing 1 to 10 of 40 entries Previous 1 2 3 4 Next

Color Scheme LogFC > 0 LogFC > 0 LogFC = 0 LogFC < -1 LogFC < -1 PValue > 0.01 PValue < 0.01 adj.PVal > 0.05 adj.PVal < 0.05 adj.PVal < 0.01

## 3.4 Advanced Analysis

Besides the above analyses, the CHOMics also provides several advanced tools.

### 3.3.1 Correlation Tools

Once the user has identified a gene of interest, the user can use correlation tools to find other genes that share similar (or opposite) profiles in terms of gene expression or fold change. First, enter the gene of interest, and samples to be used for correlation. In the example below, we entered a saved gene list, and 15 samples.

CHOMics (v1) Correlation Tool

**1. Start here**

Genes: Load from saved lists Select functional gene sets Clear

**2. Enter gene of interests**

Samples: Load from saved lists Search and Select Select a Project Clear

**3. Enter or load saved samples**

Advanced Options

How do you like to compare the genes?  
 Calculate the correlations against all available genes in database.  Calculate the correlations among the entered genes only.

Correlation Method:  
 Pearson Correlation  Spearman Correlation (Pearson Correlation Coefficient Between Ranked Variables)

Enable Log<sub>2</sub> Transform

**4. Set options**

**5. Submit**

**The result shows a table of correlated genes, ranked by R<sup>2</sup>**

| Source Gene  | Matched Gene | Correlation Coef | R Square | # of Data Points | Actions  |
|--------------|--------------|------------------|----------|------------------|----------|
| Gm           | Ctla         | 0.9977           | 0.9934   | 15               | Set Plot |
| Ctla         | Ctla         | 0.9948           | 0.9892   | 15               | Set Plot |
| Gm           | Mmp9         | 0.9905           | 0.9831   | 15               | Set Plot |
| Sergp5       | Ctla         | 0.9903           | 0.9827   | 15               | Set Plot |
| Ctla         | Sopt         | 0.9908           | 0.9817   | 15               | Set Plot |
| Sergp5       | Sopt         | 0.9904           | 0.9809   | 15               | Set Plot |
| LOC100799320 | LOC100799321 | 0.9899           | 0.9799   | 15               | Set Plot |
| Sergp5       | Gm           | 0.9897           | 0.9795   | 15               | Set Plot |
| Ctla         | Sopt         | 0.9898           | 0.9793   | 15               | Set Plot |
| Ctla         | Ctla         | 0.9893           | 0.9787   | 15               | Set Plot |
| Ctla         | Sergp5       | 0.9888           | 0.9777   | 15               | Set Plot |
| CofB         | Sergp5       | 0.9879           | 0.9769   | 15               | Set Plot |
| Ctla         | Mmp9         | 0.9879           | 0.9759   | 15               | Set Plot |

Click the plot icon will show scatter plot of the target and the correlated gene (e.g, gene Grn vs. Ctss).

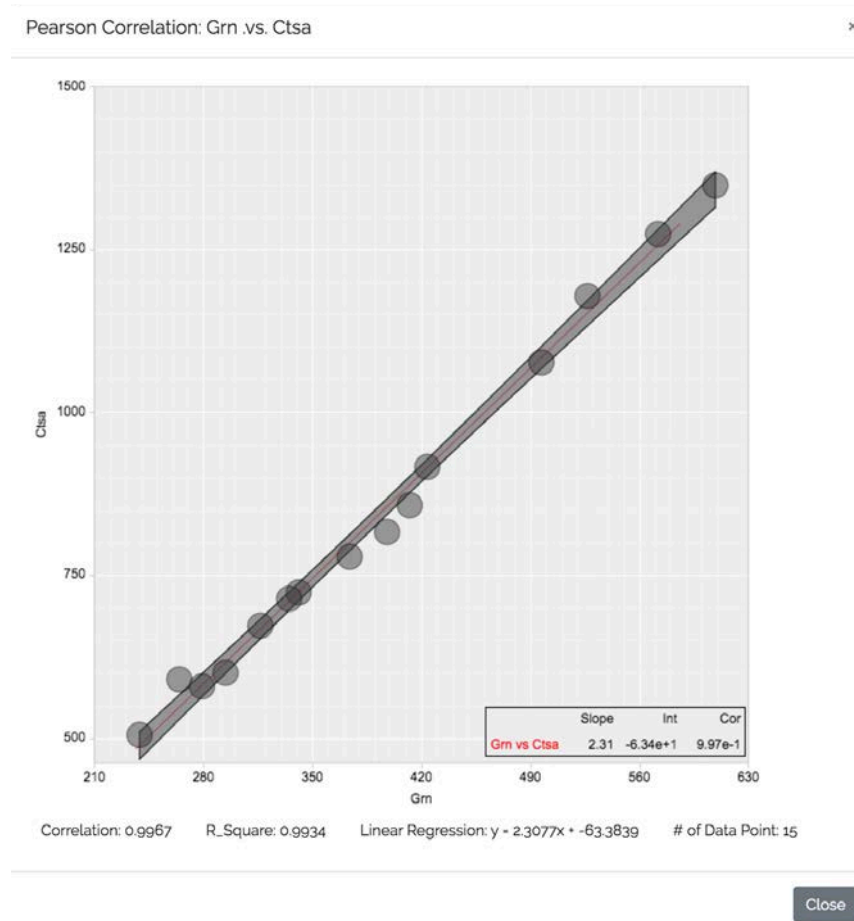

### 3.3.2 PCA Analysis

You can select a set of samples and genes and use PCA plot to visualize the sample relationships on the target gene set.

CHOMICS (v1)    Toolbox    My Analyses    Admin    Projects (0)    Comparisons (0)    Samples (0/5)    Hello, Demo User    Sign Out

#### PCA Analysis

• Saved Results    • PCA tool for uploaded data files

Genes: Load from saved lists    Load functional gene sets    Clear

Samples: Load from saved lists    Search and Select    Select a Project    Clear

Sample Attributes: 3 Selected    Show Attributes

Age     CellType     Collection     DiseaseCategory     DiseaseState     Ethnicity     Flag Remark     Flag To Remove     Gender     Infection     Organism     RN Number     RNASeq Assignment Rate     RNASeq Mapping Rate     RNASeq Total Read Count

Response     SamplePathology     SampleSource     SampleType     SamplingTime     Symptom     Tissue     TissueCategory     Transfection     Treatment     Uberon ID     Uberon Term     Check All     Check None

Submit

1. Enter or load gene of interests

2. Enter or load saved samples

3. Select sample attributes for visualization

The system will use FactorMineR package to run PCA analysis and display the results. Several PCA metrics are plotted for interactive visualization:

Eigenvalues plot the percentage of variance explained by top PCs.



Variables Plot shows the weights of top contributing genes in each PCs.

Variable Data summarizes the weights of each gene in each individual PC.

Individuals Plot shows the relationship of samples on the spanned space by different PCs.

Individual Data summarizes the score vector of each sample in each individual PC.

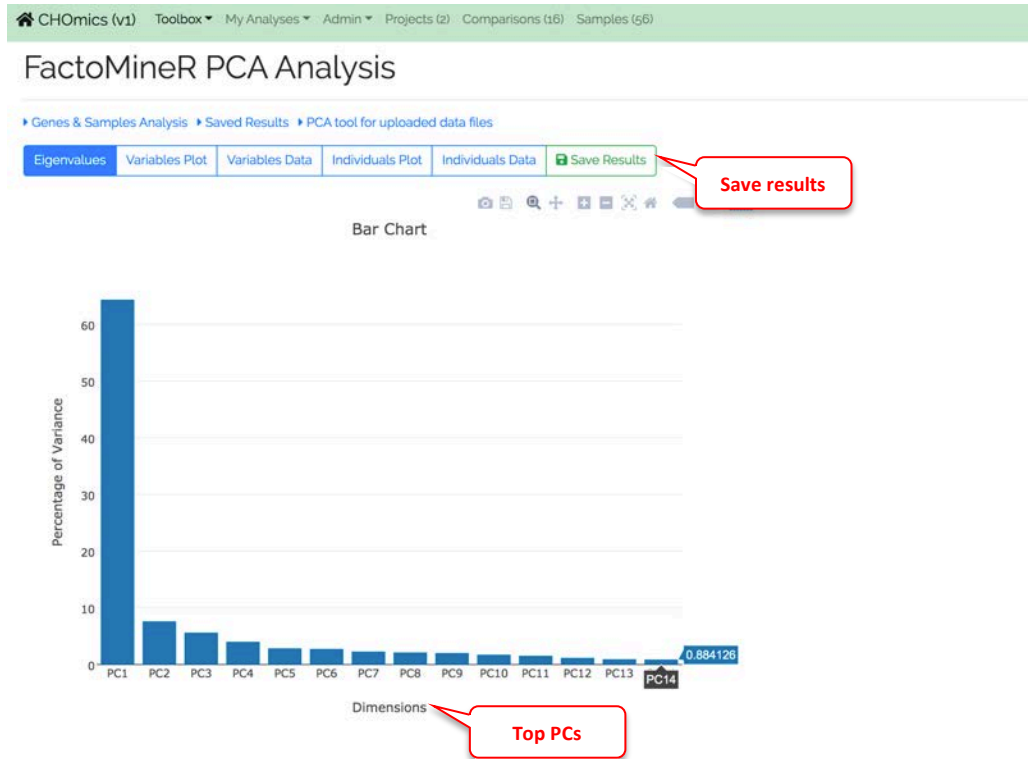

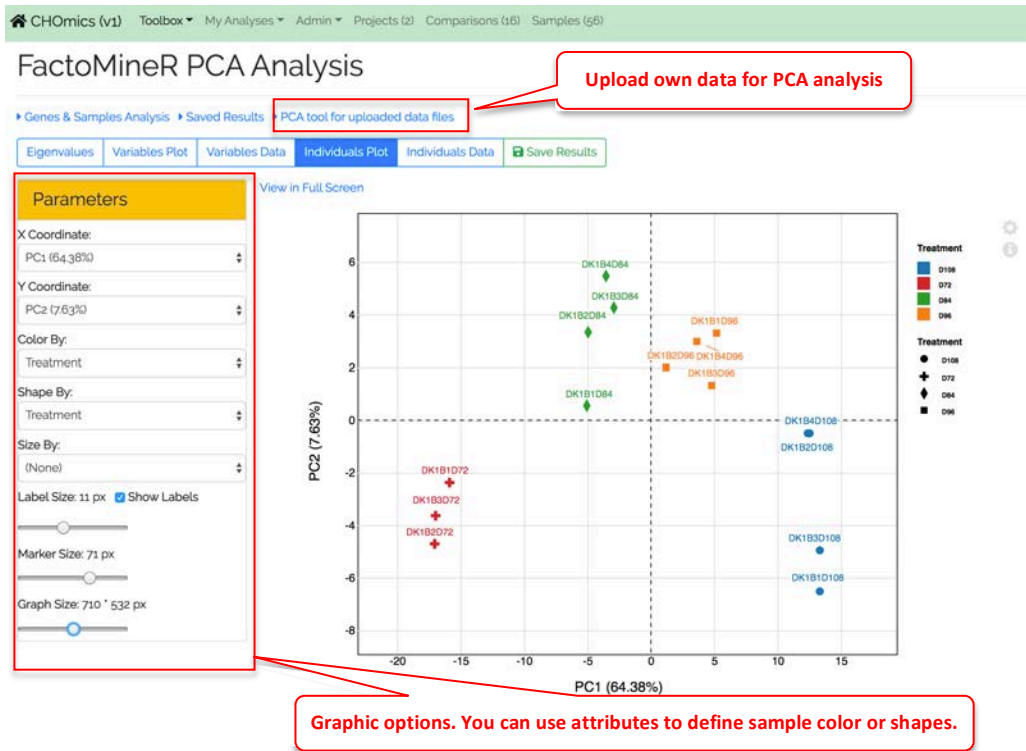

The PCA results can be saved. Users can load it in the future.

### My PCA Saved Results

Genes & Samples Analysis > Saved Results > PCA tool for uploaded data files

Show 100 entries

| Title    | Description | Actions                |
|----------|-------------|------------------------|
| Test_PCA |             | <a href="#">Delete</a> |

Showing 1 to 1 of 1 entries

Previous 1 Next

Users can upload their own data matrix or pre-calculated data for PCA analysis and visualization.

### PCA Scatter Plot Tool

Genes & Samples Analysis > Saved Results > PCA tool for uploaded data files

Upload Files: **Data file is required**

**Data File:**  No file chosen [Example Data File](#)

**Attributes File:**  No file chosen [Example Attributes File](#)

**Variance File:**  No file chosen [Example Variance File](#)

Format:  csv  txt / tsv

**Data matrix for PCA**

### 3.3.3 Meta-Analysis

Meta-Analysis can be used to identify genes that are changed consistently across multiple projects. It is listed as one functional module in toolbox panel. In the example below, we are looking for the most significant DEGs in three comparisons.

**Save meta-analysis results**

**Enter or load comparison list**

**Enter or load gene list**

**Attributes to show in results table**

**Optional parameter setting for cutoff on meta-analysis statistical results**

The meta-analysis pipeline will compute three types of results:

- 1) Maximum p-value (maxP). This method targets on DEGs have small  $p$ -values in "all" comparisons. We recommend using maxP if you are looking for DEGs that are common among several studies.
- 2) Fisher's p-value. The Fisher's method sums up the log-transformed p-values obtained from individual studies. This p-value combination method is useful if you want to identify DEGs in any of the comparisons.
- 3) We also applied simple counting method to report the frequency a gene is classified as up or down-regulated DEG from all the comparisons. The default DEG cutoff is two-fold change and  $FDR < 0.05$ . but user can change the cutoff.

In most cases, combing maxP (smaller values are more significant) and the counting method (e.g. up-regulated in 50% of studies) will give the most biological relevant results for consistently regulated genes across comparisons.

**Optional tools for visualizing and saving results**

**Filtering**

**Columns in results table**

**Select genes for visualization and other analysis**

| GeneName     | EntrezID  | Up.Per  | RankProd | RP_logFC | RP_Pval | RP_FDR | Combined_Pval_Fisher | Combined_Pval_maxP | Combined_FDR_Fisher | Combined_FDR_maxP |
|--------------|-----------|---------|----------|----------|---------|--------|----------------------|--------------------|---------------------|-------------------|
| Mb21d1       | 214763    | 66.6667 | 8.7760   | 0.8800   | 0.0033  | 0.2758 | 0.0000               | 0.0000             | 0.0000              | 0.0000            |
| Snord14e     | 100302594 | 33.3333 | 7.9260   | 1.0500   | 0.0023  | 0.3927 | 0.0000               | 0.0000             | 0.0000              | 0.0000            |
| Hspa1a       | 193740    | 33.3333 | 15.7900  | 0.8400   | 0.0199  | 0.6728 | 0.0001               | 0.0001             | 0.0002              | 0.0004            |
| LOC100689269 | 100689269 | 33.3333 | 14.9500  | 0.7800   | 0.0170  | 0.7182 | 0.0000               | 0.0000             | 0.0000              | 0.0000            |
| LOC100689270 | 100689270 | 33.3333 | 13.9000  | 0.7400   | 0.0138  | 0.7744 | 0.0000               | 0.0000             | 0.0000              | 0.0000            |
| Calcr        | 12311     | 33.3333 | 36.0400  | 0.7500   | 0.1531  | 1.2320 | 0.0000               | 0.0000             | 0.0000              | 0.0000            |
| LOC113832837 | 113832837 | 33.3333 | 33.8000  | 0.3300   | 0.1341  | 1.2590 | 0.0000               | 0.0000             | 0.0001              | 0.0000            |

In the above example, we used a relatively loose filtering criterion (N.data.points>1, and up-regulation in percentage>30% of studies, and Combined\_Pval\_MaxP <=0.0001) because only small number of genes pass the stringent default criterion.

Display Options

N.data.points >= 1

Percentage Up-Regulated >= 30

Percentage Down-Regulated >= 0.01

Combined\_Pval\_MaxP Cutoff <= 0.0001

RP\_Pval <= 0.01

Pval Fisher Cutoff <= 0.01

Number of records to show:  100  1000  3000 (limit)

Update Settings Cancel

The data table shows the genes that pass the filters. We can sort the table by maxP value. A different filter can be applied to get down-regulated genes.

The results can be saved for future access. There are also links to several other tools. The download meta data link will save a CSV file that contain results from all genes.

Next, we will choose all the genes that pass filter by checking the box for all listed genes, and use bubble plot to visualize the results.

### Bubble Plot Multiple

Single Gene Plot

Genes: [Load from saved lists](#) [Load functional gene sets](#) [Clear](#)

Calcr  
Hspata  
LOC100689269  
LOC100689270  
LOC113832837  
Mb21d1

Note: You must enter one or more gene names.

Comparisons: [Load from saved lists](#) [Search and Select](#) [Select a Project](#) [Clear](#)

D10R vs D96  
D84 vs D72  
D96 vs D84

Note: You must enter one or more comparison names.

Toggle Advanced Settings

Chart Height Scale Factor:  
1

Chart Left Margin Scale Factor:  
1

Show Columns in Table:  
 LogFC  P-Value  FDR

Unlick p-value and FDR to show only logFC

Submit

The resulting bubble plot will show all three comparisons for each gene.

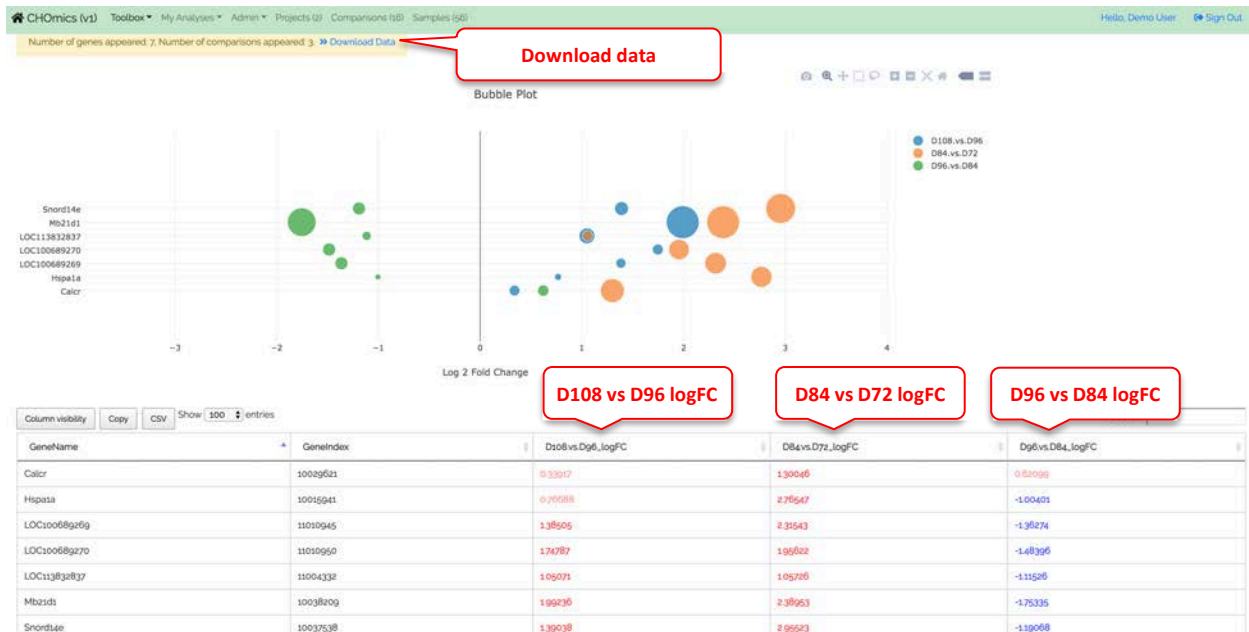

The data table below the bubble plot can also be used for filtering. Remember in the advanced settings, we choose to display logFC only, this makes it easier to look for genes that are reverted in different time points. The logFC values are colored coded (red, increase, blue, decrease), therefore we can see that most of genes show upregulation in D84, and then downregulation in D96 and then upregulation in D108.

You can also redo the plot, check all columns to include p-value and FDR in the table, and export the results to excel file.

The workflow above uses up-regulated genes as example. You can get down-regulated genes from the filter step in meta-analysis result page.

## 4 Visualization

### 4.1 Visualize Gene Expression

CHomics provides tool to easily visualize gene expression level across multiple genes, samples and omics. For each gene, you can view its expression levels across multiple samples.

#### 4.1.1 View Gene Expression from multiple samples

Choose the Gene Expression tool from Toolbox -> Gene Expression Plot from top menu, and enter the official symbol of genes or load gene list from saved lists. Alternatively, in the gene details page, click View Gene Expression link.

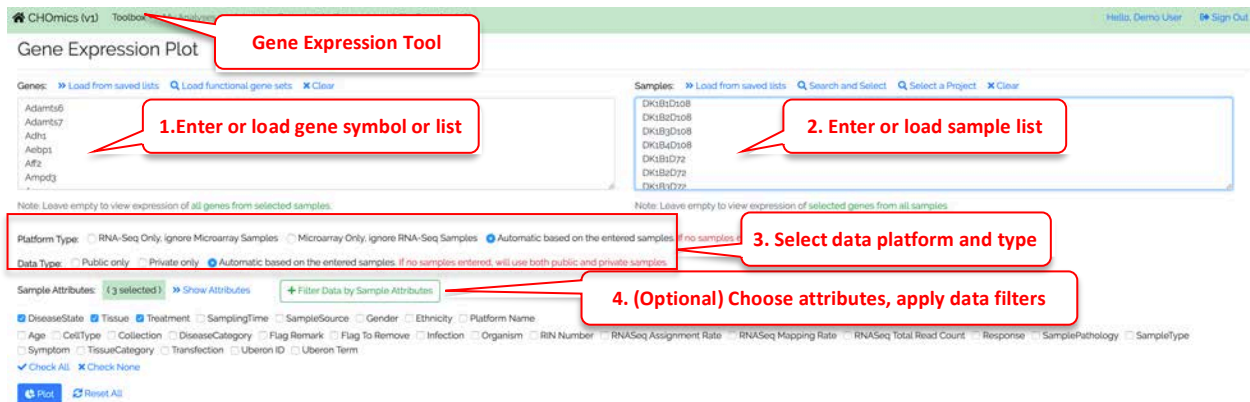

As an optional step, you can choose what sample attributes to pass to the plot, and use data filter to choose only a subset of data points.

The Data Filter can be very useful if there are too many data points, and you want to focus on a few diseases or tissue types.

The screenshots below show default boxplot showing all samples by different time points (i.e., treatment).



## 4.1.2 View Gene Expression in Heatmap

Heatmap can be useful to visualize gene profiles from multiple samples. It can also provide information about how genes and samples cluster.

The screenshot shows the CHomics v1 Heatmap interface. It features a navigation bar at the top with 'CHomics (v1)', 'Toolbox', 'My Analyses', 'Admin', 'Projects (2)', 'Comparisons (15)', and 'Samples (25)'. The main content area is titled 'Heatmap' and includes sections for 'Genes' and 'Samples'. The 'Genes' section has a list of genes (Adams6, Adams7, Adh1, Aebp1, Afp, Ampd3) and a search bar. The 'Samples' section has a list of sample IDs (DK03D84, DK04D84, DK05D96, DK06D99, DK07D96, DK08D96) and a search bar. Below these sections are 'Sample Attributes' with various checkboxes (Age, CellType, Collection, DiseaseCategory, DiseaseState, Ethnicity, Flag Remark, Flag To Remove, Gender, Infection, Organism, RIN Number, RNASeq Assignment Rate, RNASeq Mapping Rate, RNASeq Total Read Count, Response, SamplePathology, SampleSource, SampleType, SamplingTime, Symptom, Tissue, TissueCategory, Transfection, Treatment, Uberon ID, Uberon Term, Check All, Check None). A 'Submit' button and an 'Advanced Options' button are at the bottom left. Six red callout boxes with white text and red borders point to specific elements: 1. 'Start here' points to the 'Heatmap' title. 2. 'Enter or Load Saved Genes' points to the 'Genes' search bar. 3. 'Enter or Load Saved Samples' points to the 'Samples' search bar. 4. '(Optional) Choose attributes overlaying on heatmap' points to the 'Sample Attributes' section. 5. '(Optional) Change data transformation, clustering options' points to the 'Advanced Options' button. 6. 'Plot' points to the 'Submit' button.

You can enter genes and samples in the box, or load pre-saved genes and samples quickly from your collection. By default, we will log<sub>2</sub> transform the gene expression data, perform scaling of the data across samples for each gene, and limit the scaled value to -3 to 3 before displaying the data in heatmap. This works well in most situations. However, advanced users can change the options. For example, if you want to keep the order of samples as you entered, just uncheck “Cluster Samples”.

The 'Advanced Options' dialog box is shown, titled 'Advanced Options' with a close button (x) in the top right corner. It is divided into two sections: 'Data Options' and 'Display Options'. Under 'Data Options', there are four checked checkboxes: 'Enable Log<sub>2</sub> Transform' (with a text input field 'Value To Be Added For Log Transformation: 0.5'), 'Enable Z-Score Transform', 'Enable Upper Limit' (with a text input field '3'), and 'Enable Lower Limit' (with a text input field '-3'). There are also two checked checkboxes: 'Cluster Genes' and 'Cluster Samples'. Under 'Display Options', there are three checked checkboxes: 'Overlay Samples', 'Display Gene Names', and 'Display Sample IDs'. A blue 'Close' button is located at the bottom right of the dialog box.

The heatmap is rendered by CanvassXpress. You can change the plot size if needed.





[Plot](#) [Reset All](#)

### Summary of Data

- 1 gene found: Ctsa
- 25 samples found: DK1B1D108, DK1B2D108, DK1B3D108, DK1B4D108, DK1B1D72, DK1B2D72, DK1B3D72, DK1B1D84, DK1B2D84, DK1B3D84, DK1B4D84, DK1B1D96, DK1B2D96, DK1B3D96, DK1B4D96, P\_DK1-B1-D108, P\_DK1-B2-D108, P\_DK1-B3-D108, P\_DK1-B4-D108, P\_DK1-B3-D72, P\_DK1-B3-D84, P\_DK1-B4-D84, P\_DK1-B2-D96, P\_DK1-B3-D96, P\_DK1-B4-D96

Download: [Raw Data File](#)

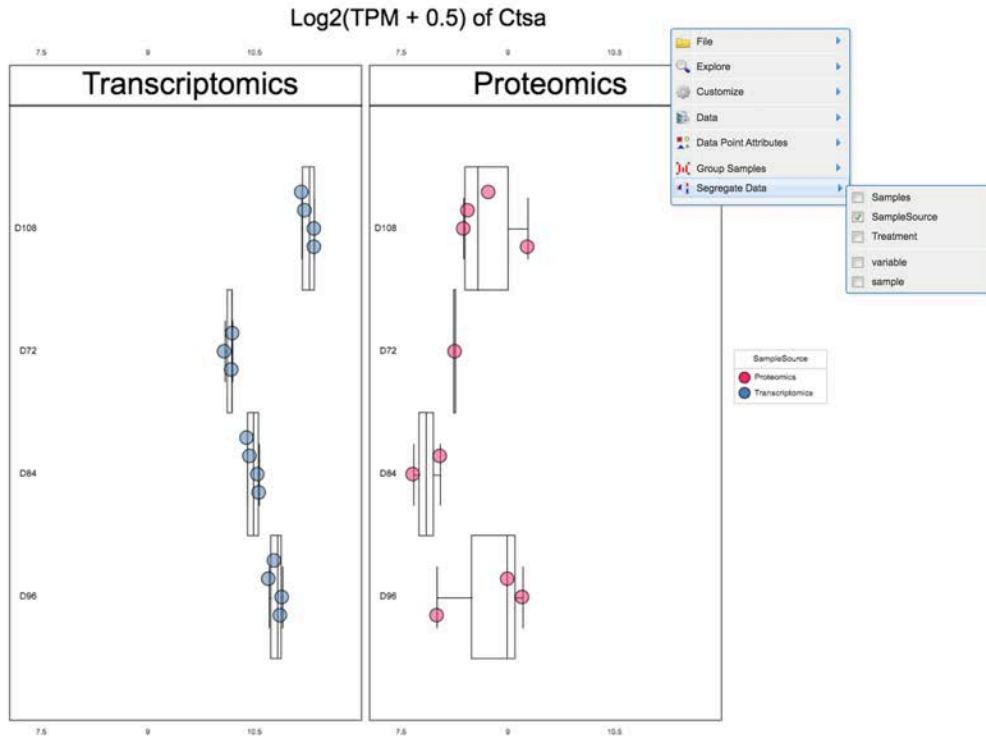

## 4.2 Visualize Comparison Data

### 4.2.1 Dashboard View of Comparison

The dashboard shows a summary of all the comparisons.

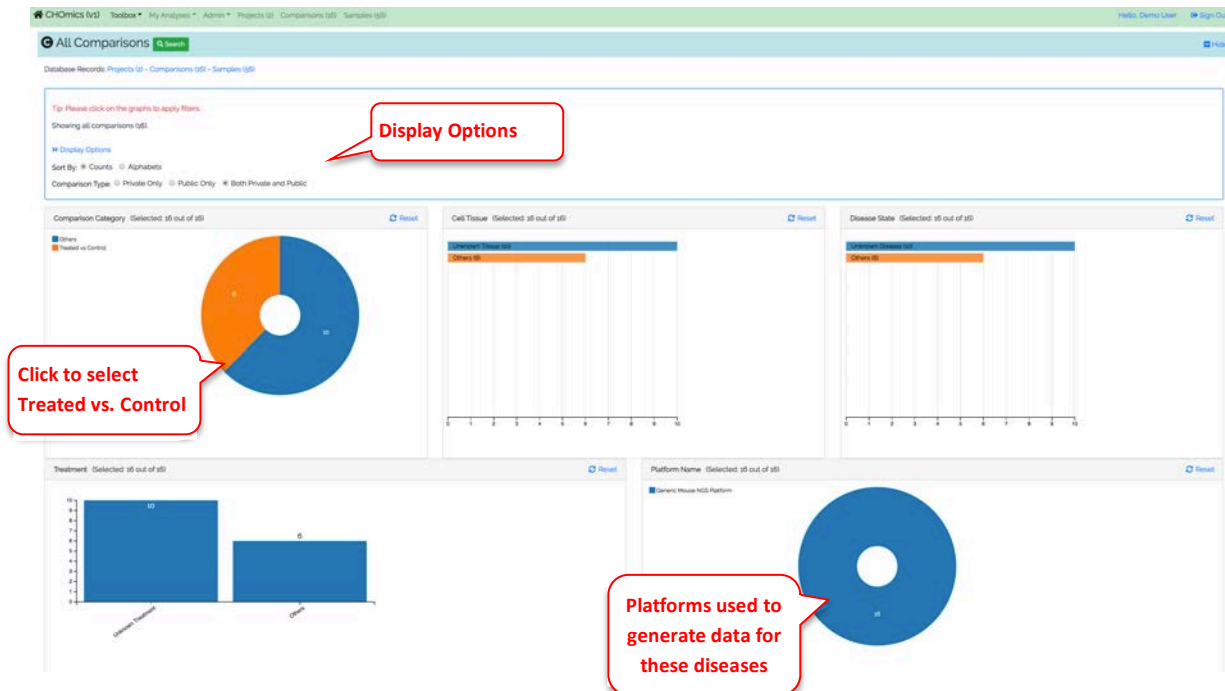

The above dashboard shows the comparisons from different Categories, Cell Type, Disease State, Treatment, Platform, etc. Below the dashboard, there is also a table listing all the comparisons.

In addition, users can set Dashboard Preference to change how the comparison summary is displayed.

### Dashboard Options ×

---

**Comparison Category:**

Show Top 15 Only

**Cell Tissue:**

Hide "Unknown Tissue"  Hide "Others" Type  Show Top 15 Only

**Disease State:**

Hide "Unknown Disease"  Hide "normal control"  Hide "Others" Type  Show Top 15 Only

**Treatment:**

Hide "Unknown Treatment"  Hide "Others" Type  Show Top 15 Only

**Platform Name:**

Hide "Generic" Types  Show Top 15 Only

---

Save
Close

## 4.2.2 Bubble Plot

Bubble plot is another useful demonstration of gene or gene set in comparisons. For each gene, you can view all the available comparisons in a bubble chart.

CHOmics (v1) Toolbox My Analyses Admin Projects (1) Comparisons (12) Samples (30)

# Bubble Plot

» Multiple genes .vs. multiple comparisons

Gene Name:  Gene Symbol  
Please enter the gene name, e.g., BRWD1-IT2

Y-axis Field:

Coloring Field:

Comparison Type:

[Next Step](#)

The default settings work for most users. After clicking the Next Step button, you will see a plot like:

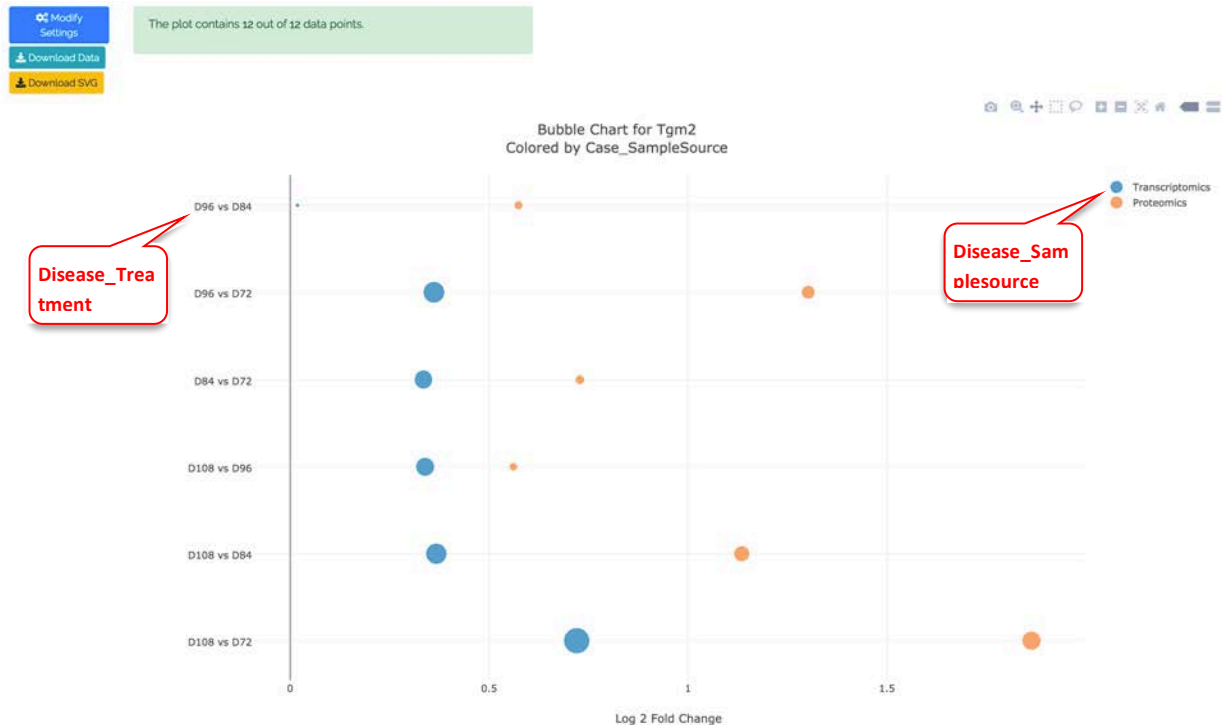

In the bubble plot, the X-axis shows log<sub>2</sub> Fold Change of the comparison, the Y-axis shows 'Case\_treatment'. Each dot represents the comparison result of this gene from one comparison. The color of the dot represent 'Case\_Samplesource' (i.e, here we set as omics type), and the size of the dot represent significance (-log<sub>10</sub>(FDR), larger is more significant).

The user can click and unclick the color legend at right to select or deselect omics types. When mouse over a dot, more details are shown. And the user can also click the dot to link to other graphs.

The tool bars at top right corner allows the user to zoom and pan the graph.

The screenshot below shows the same bubble chart after selecting one omics type (i.e,transcriptomics), and zoom into a portion of the chart.

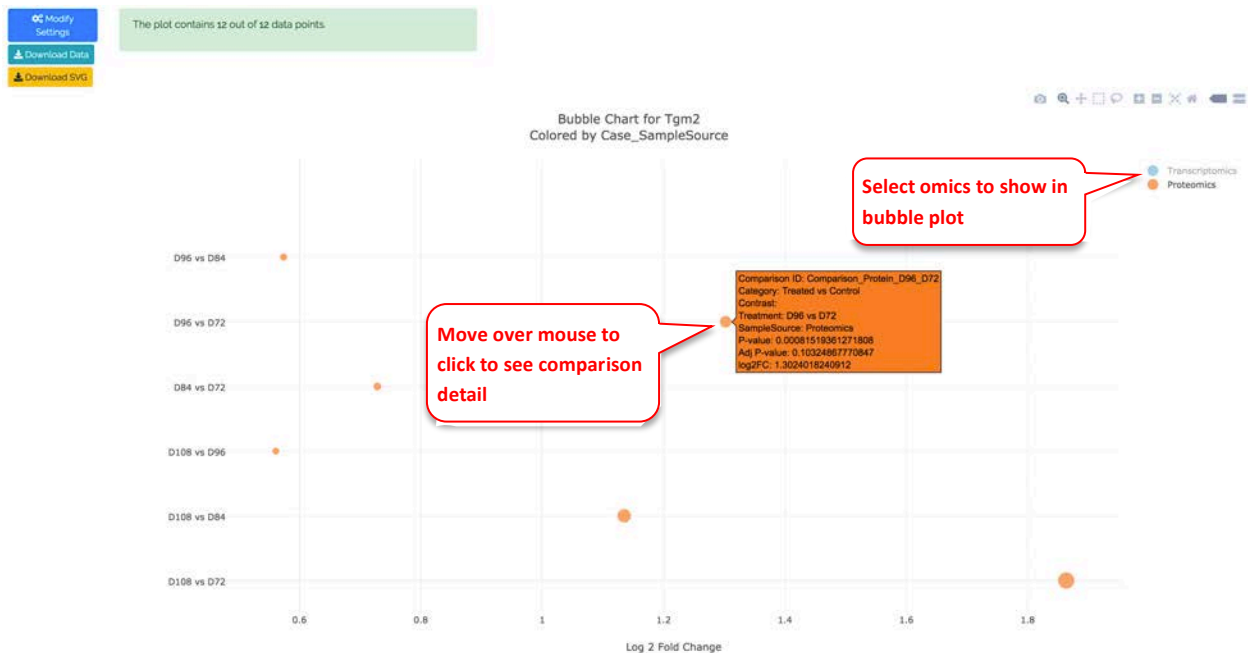

## Data Filter and Advanced Settings in Bubble Plot

In addition, advanced users can change settings by click "Modify Settings Button". For example, the user may want to show a selected list of diseases. After clicking Customize in Case\_Treatment, user can select which treatments to display in the pop-up window.

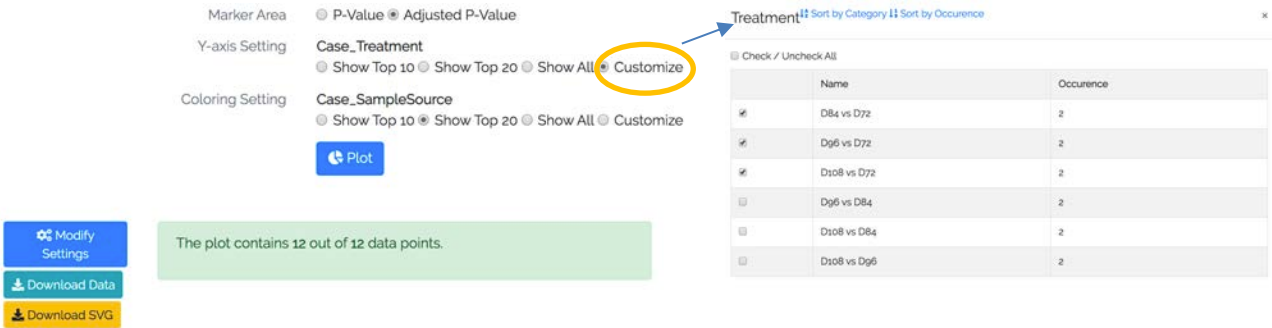

Marker Area  P-Value  Adjusted P-Value

Y-axis Setting **Case\_Treatment**  
 Show Top 10  Show Top 20  Show All  Customize

Coloring Setting **Case\_SampleSource**  
 Show Top 10  Show Top 20  Show All  Customize

[Plot](#)

[Modify Settings](#)  
[Download Data](#)  
[Download SVG](#)

The plot contains 12 out of 12 data points.

**Treatment**  Sort by Category  Sort by Occurrence

Check / Uncheck All

|                                     | Name        | Occurrence |
|-------------------------------------|-------------|------------|
| <input checked="" type="checkbox"/> | D84 vs D72  | 2          |
| <input checked="" type="checkbox"/> | D96 vs D72  | 2          |
| <input checked="" type="checkbox"/> | D108 vs D72 | 2          |
| <input type="checkbox"/>            | D96 vs D84  | 2          |
| <input type="checkbox"/>            | D108 vs D84 | 2          |
| <input type="checkbox"/>            | D108 vs D96 | 2          |

After modifying the setting, the user can click plot button to view the new chart. The system will display how many data points are chosen based on the filter.

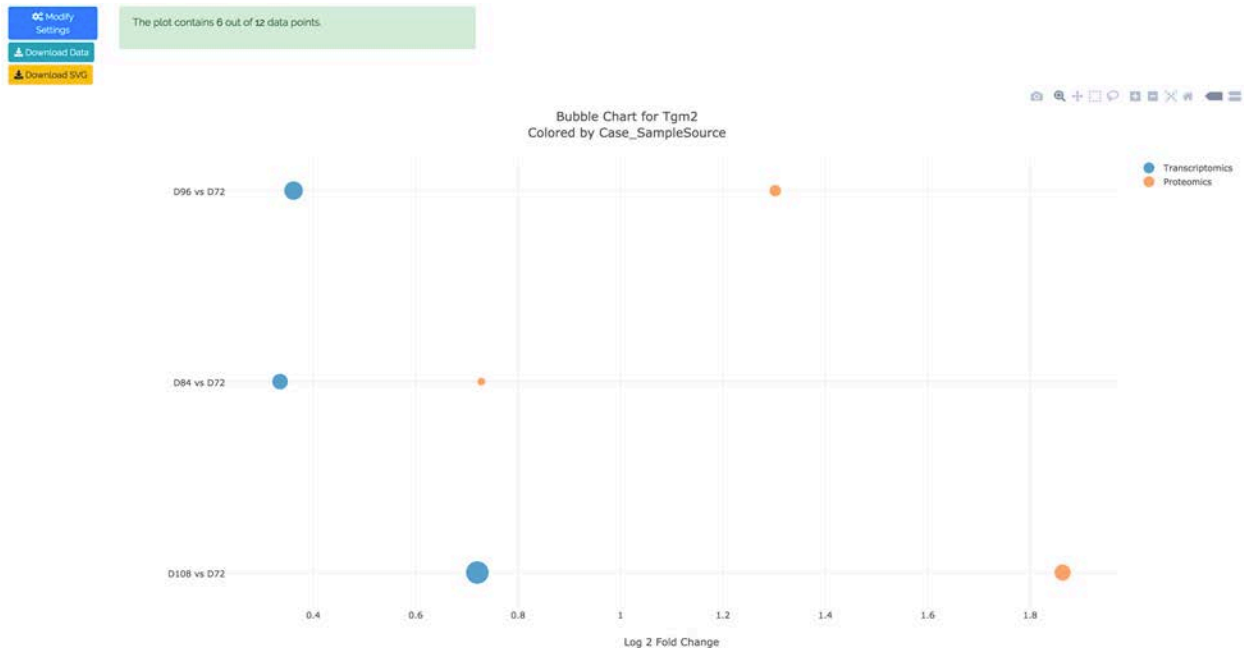

## Bubble Plot of Multiple Genes and Multiple Comparisons

It can be useful to look at a set of genes (e.g. all differentially expressed genes, or genes from a certain pathways) in a set of related comparisons (e.g. all from the same disease).

To view this type of bubble plot, select the link for Multiple Genes vs. multiple comparisons.

CHOmics (v1) | Toolbox | My Analyses | Admin | Projects (2) | Comparisons (16) | Samples (56)

### Bubble Plot

» Multiple genes vs. multiple comparisons

**Bubble plot of gene set**

Gene Name:   
Please enter the gene name, e.g., BRWD1-IT2

Y-axis Field:

Coloring Field:

Comparison Type:

[Next Step](#)

In the Genes and Comparisons Bubble plot window, you can now enter the symbols of the genes, and the comparison names. However, it is much easier to use the saved genes and saved comparisons features, or other tools from the system to quickly get a get set. Please see below for details.

CHOmics (v1) | Toolbox | My Analyses | Admin | Projects (2) | Comparisons (16) | Samples (56) | Hello, Demo User | Sign Out

### Bubble Plot Multiple

» Single Gene Plot

Genes: [Load from saved lists](#) [Load functional gene sets](#) [Clear](#)

**Load saved gene list**

Comparisons: [Load from saved lists](#) [Search and Select](#) [Select a Project](#) [Clear](#)

**Load saved comparisons**

Note: You must enter one or more gene names.

Note: You must enter one or more comparison names.

[Toggle Advanced Settings](#)

[Submit](#)

In the example below, we use dashboard to select 6 comparisons that are for different time points in CHO cell lines. We save the comparisons and load in the bubble plot tool. For gene list, we get the up-regulated genes from comparison D72 vs D108, and paste into the gene names fields.

In the bubble plot, the gene symbols are listed in Y-axis. The X-axis represents logFC, and color of the bubble represents comparison; the size of the bubble represents the significance.

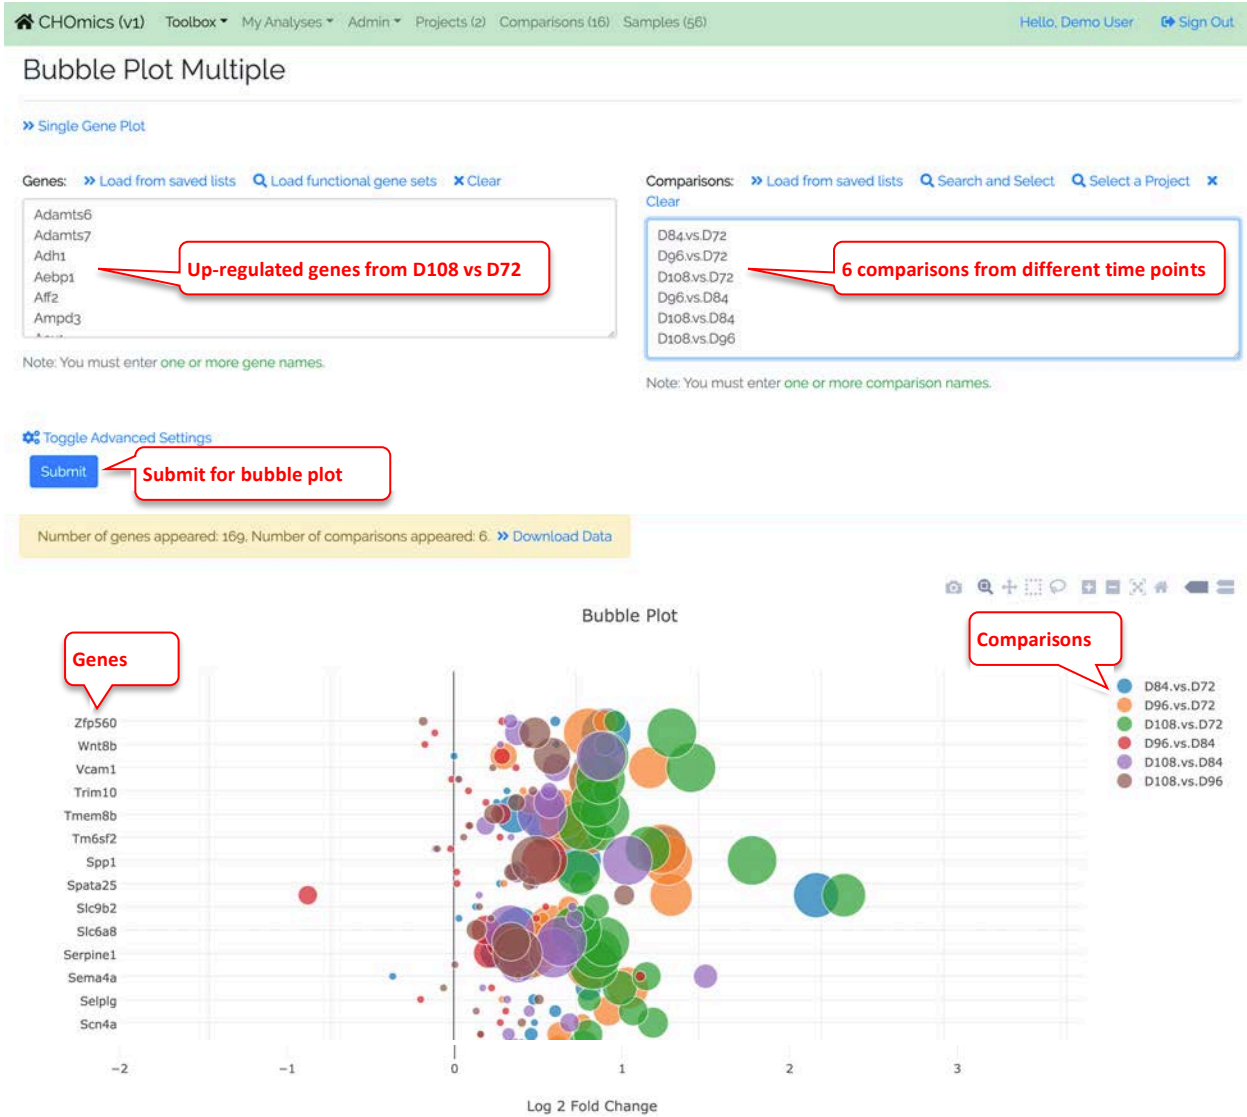

In the legend, the color keys for comparisons are shown. You can click the color key in the legend to hide/show comparisons. The size of the color dot in the legend correlates to the largest bubble for that comparison, which is the most significant gene with the smallest FDR.

### Bubble Plot of Multiple Omics data

Similar to the bubble plot of multiple genes across multiple comparisons, users can further compare the genes on the comparisons from different omics data.



## Bubble Plot Multiple

» [Single Gene Plot](#)

**Genes:** » [Load from saved lists](#) [Load functional gene sets](#) [Clear](#)

cdk1  
cltc  
crip2  
gm9242  
hadhb  
khsrp

Note: You must enter one or more gene names.

**Comparisons:** » [Load from saved lists](#) [Search and Select](#) [Select a Project](#)

D108 vs D72  
Comparison\_Protein\_D108\_D72

Note: You must enter one or more comparison names.

[Toggle Advanced Settings](#)

[Submit](#)

Number of genes appeared: 10. Number of comparisons appeared: 2. [Download Data](#)

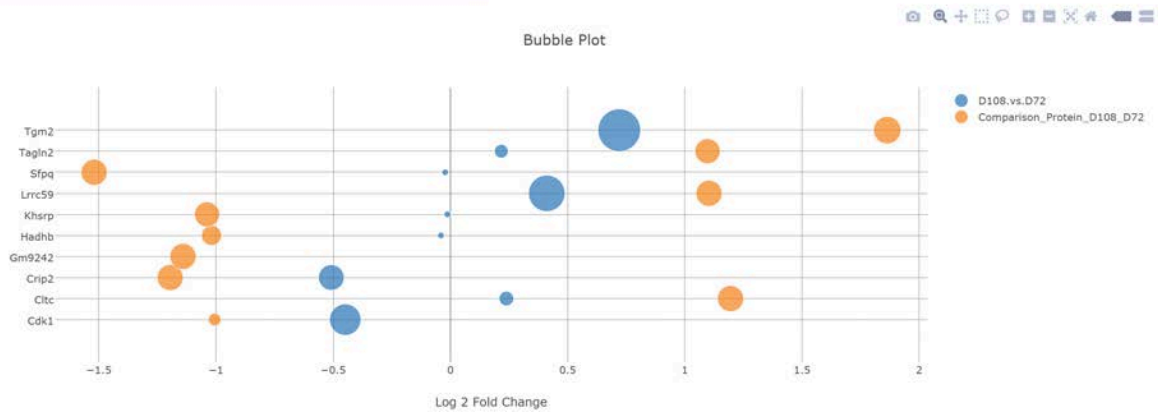

### 4.2.3 Get significant genes from comparisons

Another way to get a gene set to visualize in the genes/comparisons bubble plot is to filter for significantly changed genes. To do this, first select a few comparisons from the dash board, and click the "View Significantly Changed Genes" button.

CHOmics (v1) | [Toolbox](#) | [My Analyses](#) | [Admin](#) | [Projects \(1\)](#) | [Comparisons \(12\)](#) | [Samples \(3\)](#) | Hello, Demo User | [Sign Out](#)

**My Private Projects** [Show](#)

**All Comparisons** [Search](#) [Show](#)

**List of Comparisons** [Hide](#)

[View Comparison List](#) [Bubble Plot](#) [Significantly Changed Genes](#) [Pathway Heatmap](#) [Meta Analysis](#) [Export Comparison Data](#) [KEGG Pathways](#) [Reactome Pathways](#) [KEGG Pathways](#)

[Gene Expression Plot](#) [Heatmap](#) [Comparison Tool](#) [PCA Analysis](#) [Export Expression Data](#)

Column visibility: Copy CSV Show: 10 entries Search:

|                                     | Name                        | ComparisonCategory | Case_Tissue    | Case_DiseaseState | Case_Treatment | PlatformName               |
|-------------------------------------|-----------------------------|--------------------|----------------|-------------------|----------------|----------------------------|
| <input type="checkbox"/>            | Dg6 vs D84                  | Others             | Unknown Tissue | Unknown Disease   | Dg6 vs D84     | Generic Mouse NGS Platform |
| <input type="checkbox"/>            | Dg6 vs D72                  | Others             | Unknown Tissue | Unknown Disease   | Dg6 vs D72     | Generic Mouse NGS Platform |
| <input type="checkbox"/>            | D84 vs D72                  | Others             | Others         | Others            | D84 vs D72     | Generic Mouse NGS Platform |
| <input type="checkbox"/>            | D108 vs Dg6                 | Others             | Unknown Tissue | Unknown Disease   | D108 vs Dg6    | Generic Mouse NGS Platform |
| <input type="checkbox"/>            | D108 vs D84                 | Others             | Unknown Tissue | Unknown Disease   | D108 vs D84    | Generic Mouse NGS Platform |
| <input checked="" type="checkbox"/> | D108 vs D72                 | Others             | Unknown Tissue | Unknown Disease   | D108 vs D72    | Generic Mouse NGS Platform |
| <input type="checkbox"/>            | Comparison_Protein_Dg6_D84  | Treated vs Control | Others         | Others            | Dg6 vs D84     | Generic Mouse NGS Platform |
| <input type="checkbox"/>            | Comparison_Protein_Dg6_D72  | Treated vs Control | Others         | Others            | Dg6 vs D72     | Generic Mouse NGS Platform |
| <input type="checkbox"/>            | Comparison_Protein_D84_D72  | Treated vs Control | Others         | Others            | D84 vs D72     | Generic Mouse NGS Platform |
| <input type="checkbox"/>            | Comparison_Protein_D108_Dg6 | Treated vs Control | Others         | Others            | D108 vs Dg6    | Generic Mouse NGS Platform |

Showing 1 to 10 of 12 entries Previous 1 2 Next

Dashboard filter.

In table, select comparisons and view significantly changed genes.

In the significantly Changed Genes window, the comparisons from the previous page are already loaded. You can add or remove comparisons if needed.

Now select direction (up-, down-, or both), and use the logFC cutoff and FDR value to get a list of genes. Depending on the comparisons, sometimes you may need to adjust the logFC and FDR values to get a good list of genes. In general, for bubble plot, using <100 genes will make the graph easier to read.

Once you are happy with the gene list, you can save it. You can also export the list for later use.

CHOmics (v1) [Toolbox](#) [My Analyses](#) [Admin](#) [Projects \(1\)](#) [Comparisons \(12\)](#) [Samples \(30\)](#)

## Significantly Changed Genes

Comparisons: [Load from saved lists](#) [Search and Select](#) [Select a Project](#) [Clear](#)

D108.vs.D72  
D108.vs.D84  
D108.vs.Dg6  
D84.vs.D72  
Dg6.vs.D72  
Dg6.vs.D84

List of selected comparisons

Or, upload your comparison files:  No file chosen [Demo Data](#)

Display Options:  Log2FC  PValue  FDR

Fold Change Cutoff:

Statistic Cutoff:

List Genes:  Common Genes from All Comparisons  Genes from Any Comparisons

[Save Comparison List](#) [Bubble Plot](#) [Pathway Heatmap](#) [Meta Analysis](#) [Export Comparison Data](#) [WikiPathways](#) [Reactome Pathways](#) [KEGG Pathways](#)

[Save Gene List](#) [Gene Expression Plot](#) [Heatmap](#) [Correlation Tool](#) [PCA Analysis](#) [Export Expression Data](#)

Column visibility   Show  entries

Showing 1 to 10 of 15 entries

|                          | GeneName             | Description  | D108.vs.D72<br>- Log2FC | D108.vs.D72<br>- PValue | D108.vs.D72<br>- FDR | D108.vs.D84<br>- Log2FC | D108.vs.D84<br>- PValue | D108.vs.D84<br>- FDR | D108.vs.Dg6<br>- Log2FC |
|--------------------------|----------------------|--------------|-------------------------|-------------------------|----------------------|-------------------------|-------------------------|----------------------|-------------------------|
| <input type="checkbox"/> | <a href="#">Cd68</a> | CD68 antigen | 1.5075                  | 0.0000                  | 0.0000               | 0.9910                  | 0.0000                  | 0.0001               | 0.5591                  |
| <input type="checkbox"/> | <a href="#">Clu</a>  | clusterin    | 1.8516                  | 0.0000                  | 0.0000               | 1.2528                  | 0.0000                  | 0.0000               | 0.8301                  |
| <input type="checkbox"/> | <a href="#">Ctsb</a> | cathepsin B  | 1.1143                  | 0.0000                  | 0.0000               | 0.7742                  | 0.0000                  | 0.0000               | 0.4140                  |

## View Significantly Changed Genes in Bubble Plot

Back to the bubble plot, you can load the saved comparisons and saved genes and view the plot.

Save to comparison list

Save to gene list

| Gene                                | Description                  | D108 vs D72 - Log2FC           | D108 vs D72 - PValue | D108 vs D72 - FDR | D108 vs D84 - Log2FC | D108 vs D84 - PValue | D108 vs D84 - FDR | D108 vs D96 - Log2FC | D108 vs D96 - PValue | D108 vs D96 - FDR | D84 vs D72 - Log2FC | D84 vs D72 - PValue |
|-------------------------------------|------------------------------|--------------------------------|----------------------|-------------------|----------------------|----------------------|-------------------|----------------------|----------------------|-------------------|---------------------|---------------------|
| <input checked="" type="checkbox"/> | <a href="#">Cd68</a>         | CD68 antigen                   | 1.5075               | 0.0000            | 0.0000               | 0.9919               | 0.0000            | 0.5591               | 0.0000               | 0.0061            | 0.4969              | 0.0002              |
| <input checked="" type="checkbox"/> | <a href="#">Clu</a>          | clusterin                      | 1.8516               | 0.0000            | 0.0000               | 1.2528               | 0.0000            | 0.8301               | 0.0000               | 0.0003            | 0.6806              | 0.0000              |
| <input checked="" type="checkbox"/> | <a href="#">Ctsb</a>         | cathepsin B                    | 1.1143               | 0.0000            | 0.0000               | 0.7742               | 0.0000            | 0.4140               | 0.0000               | 0.0006            | 0.3224              | 0.0005              |
| <input checked="" type="checkbox"/> | <a href="#">Ctsl</a>         | cathepsin L                    | 1.1178               | 0.0000            | 0.0000               | 0.7777               | 0.0000            | 0.3968               | 0.0000               | 0.0008            | 0.3222              | 0.0039              |
| <input checked="" type="checkbox"/> | <a href="#">Doxl2</a>        | diamine oxidase-like protein 2 | -1.5420              | 0.0000            | 0.0000               | -0.9831              | 0.0000            | -0.4795              | 0.0002               | 0.0186            | -0.5774             | 0.0000              |
| <input checked="" type="checkbox"/> | <a href="#">Grn</a>          | granulin                       | 1.0717               | 0.0000            | 0.0000               | 0.7742               | 0.0000            | 0.4449               | 0.0000               | 0.0049            | 0.2799              | 0.0038              |
| <input checked="" type="checkbox"/> | <a href="#">LOC10071976</a>  |                                | 1.1626               | 0.0000            | 0.0000               | 0.6455               | 0.0000            | 0.2467               | 0.0009               | 0.0364            | 0.4993              | 0.0001              |
| <input checked="" type="checkbox"/> | <a href="#">LOC103162429</a> |                                | 1.2001               | 0.0000            | 0.0000               | 0.5994               | 0.0000            | 0.2880               | 0.0003               | 0.0204            | 0.6830              | 0.0000              |
| <input checked="" type="checkbox"/> | <a href="#">Mmp19</a>        | matrix metalloproteinase 19    | 0.9750               | 0.0000            | 0.0000               | 0.5372               | 0.0000            | 0.1829               | 0.0014               | 0.0440            | 0.4200              | 0.0000              |
| <input checked="" type="checkbox"/> | <a href="#">Mmp3</a>         | matrix metalloproteinase 3     | 1.4305               | 0.0000            | 0.0000               | 0.7182               | 0.0000            | 0.2204               | 0.0013               | 0.0416            | 0.6043              | 0.0000              |
| <input checked="" type="checkbox"/> | <a href="#">Nppb</a>         | natriuretic peptide type B     | 1.7812               | 0.0000            | 0.0000               | 0.9140               | 0.0000            | 0.4367               | 0.0001               | 0.0100            | 0.8486              | 0.0000              |
| <input checked="" type="checkbox"/> | <a href="#">Plat</a>         | plasminogen activator, tissue  | 1.0157               | 0.0000            | 0.0001               | 0.6146               | 0.0000            | 0.2990               | 0.0005               | 0.0258            | 0.3832              | 0.0015              |

In the example below, it can be seen that most significant genes come from down-regulated direction from the first four comparisons.

Load saved gene list

Load saved comparison list

Number of genes appeared 15, Number of comparisons appeared 6

Bubble Plot

Log 2 Fold Change

Legend:

- D108 vs D72
- D108 vs D84
- D108 vs D96
- D84 vs D72
- D96 vs D72
- D96 vs D84

#### 4.2.4 Volcano Plot

Volcano plot is useful to view a top level summary of how many genes are significantly up- or down-regulated in a comparison.

CHOmics (v1) **Toolbox** My Analyses Admin Projects (2) Comparisons (16) Samples (56)

### Volcano Plot

1. Start here

2. Search to find comparison

Comparison Name:

Please enter the comparison id, e.g., GSE43696.GPL6480.test2

Y-axis Statistics:  P-value  FDR Cutoff:

Fold Change Cutoff:

Chart Name:

3. (Optional) Change settings

Show Gene Symbol:  Auto (based on cutoff)  Customize

4. Submit  Chart Width (px):  Chart Height (px):  [Add A New Chart](#)

Fold Change Cutoff: 2, Log<sub>2</sub>(Fold Change Cutoff): 1.000, FDR Cutoff: 0.05, -Log<sub>10</sub>(FDR Cutoff): 1.301

[View comparison details](#) [View comparison genes](#)

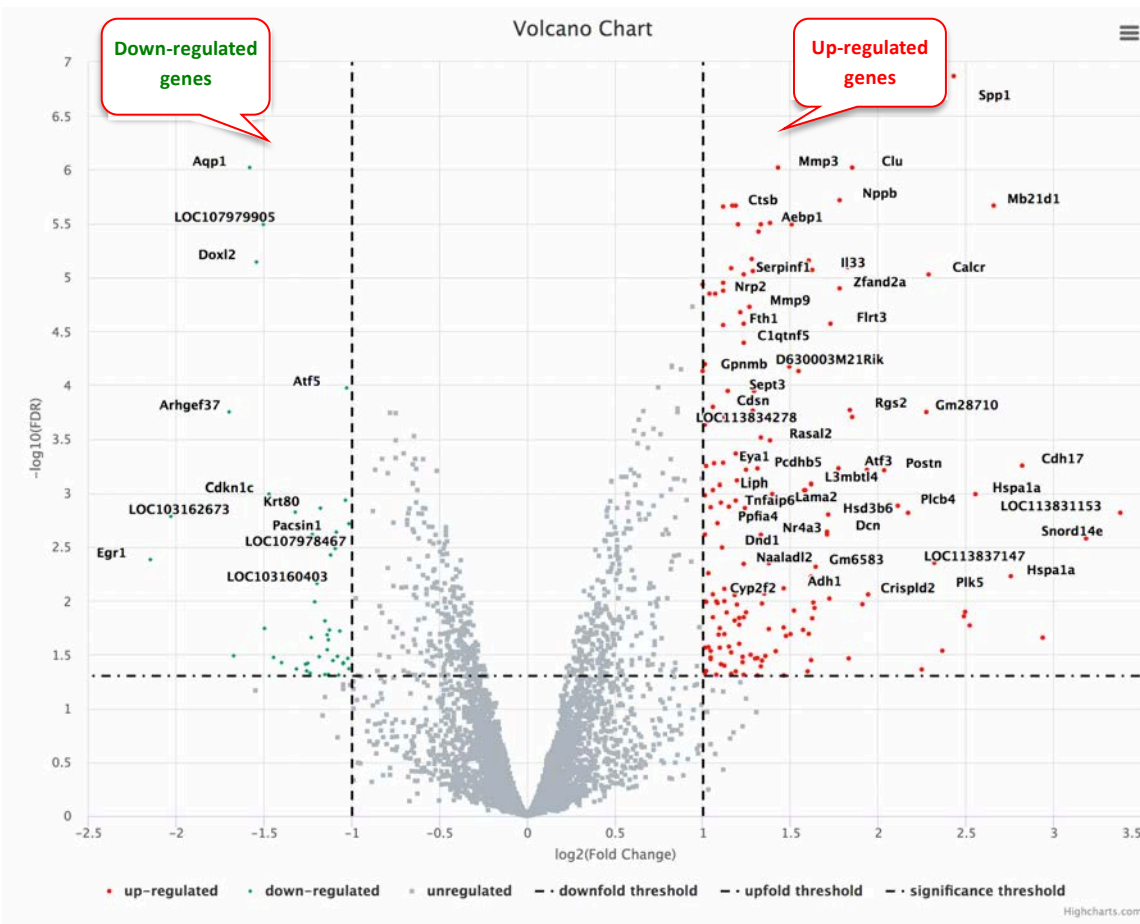

You can use mouse to drag over an area to zoom in.

Mouse over a point will show the gene details. Click the data point will show you links to other graphs.

### View Multiple Volcano Plots Together

Users can also show multiple comparisons side-by-side. If needed, the user can also highlight the same group of genes across the volcano plots.

The resulting volcano plots are shown as below. Selected genes are shown as orange dots.

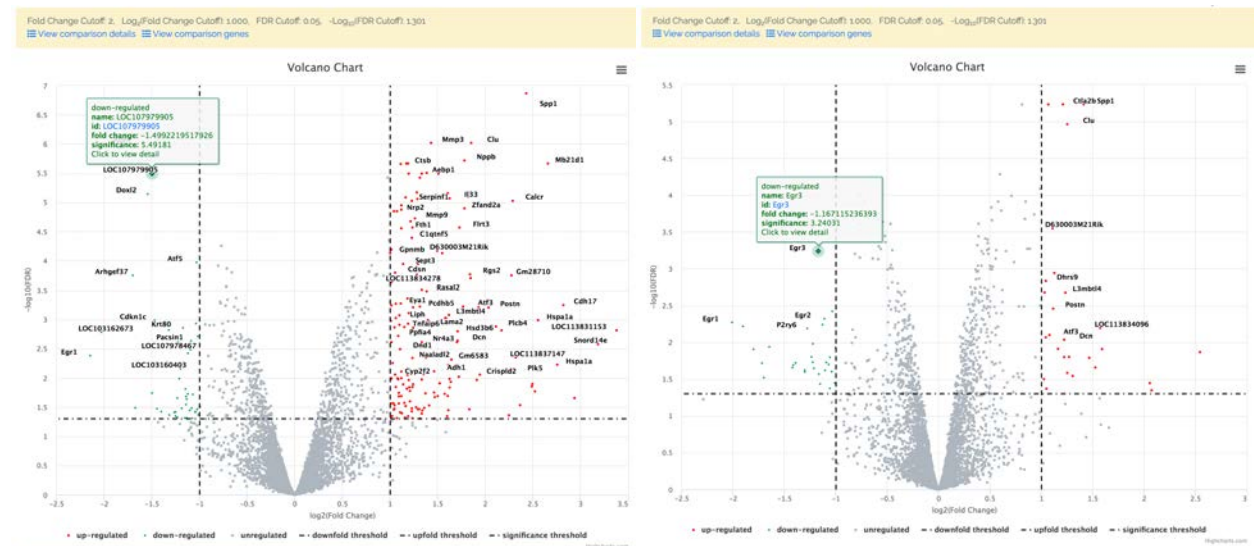

## 4.3 Visualize functional pathway

### 4.3.1 Enrichment from Up and Down Regulated Genes

When you view details of a comparison, the functional enrichment results are shown. Briefly, for each comparison, we generated the up- and down- regulate gene lists, and use these lists to compare with all genes in the genome to identify functions that are significantly enriched.

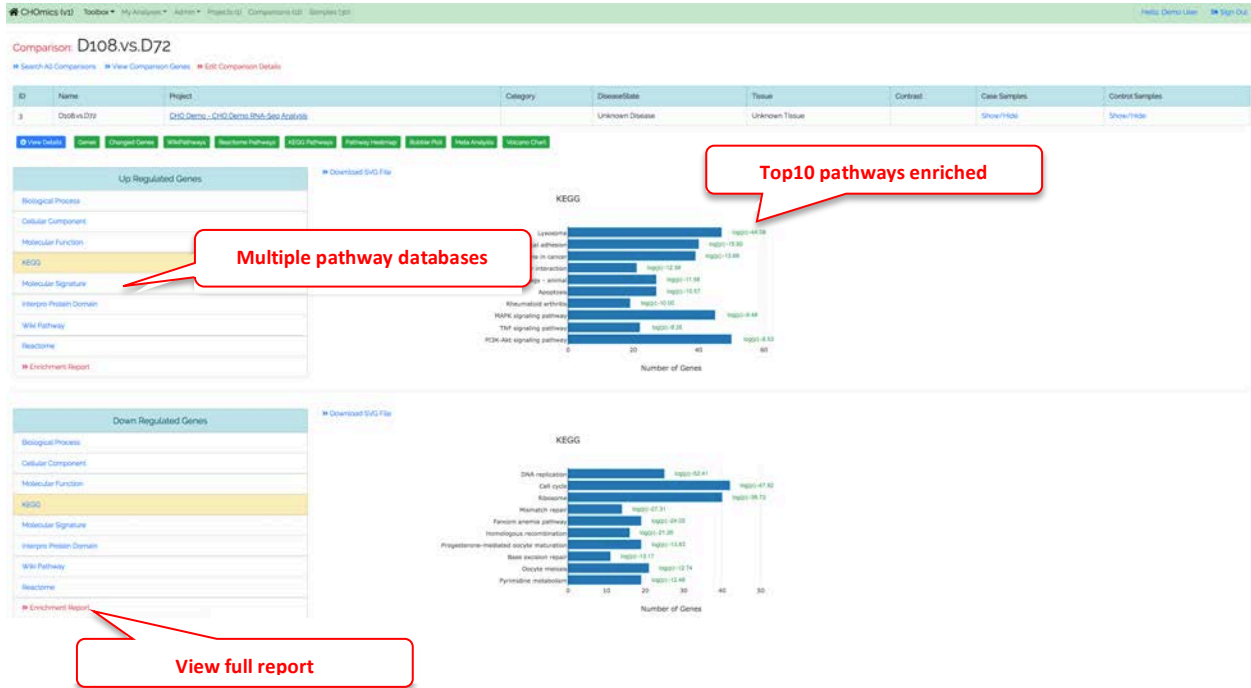

In the example above, this comparison is between D108 vs D72, and the top up-regulated biological processes are response to virus, immune effector process.

Click the left menu will switch the bar charts for different categories (Gene Ontology, KEGG, Molecular signature, Protein domain etc).

The bar charts here show the top 10 categories. To view complete results, click the Enrichment Report.

# Gene Ontology Enrichment Results

Download enrichment results file

Functional Terms

Top10 pathways enriched

| GO Tree       | TermID                                | Term                                  | Enrichment            | logP               | Genes in Term | Target Genes in Term | Fraction of Targets in Term | Total Target Genes | Total Genes | Actions    |
|---------------|---------------------------------------|---------------------------------------|-----------------------|--------------------|---------------|----------------------|-----------------------------|--------------------|-------------|------------|
| MSigDB        | LEE_BMP2_TARGETS_DN                   | LEE_BMP2_TARGETS_DN                   | 3.9176324871508e-31   | -70.0146564295904  | 807           | 153                  | 0.13871260199456            | 1103               | 15729       | Show Genes |
| Gene Ontology | GO:004424                             | intracellular part                    | 3.39305799347635e-25  | -56.3517766476754  | 13440         | 933                  | 0.75980198019802            | 1212               | 20830       | Show Genes |
| Gene Ontology | GO:000562                             | intracellular                         | 6.67887260173594e-25  | -56.6656781237414  | 13317         | 936                  | 0.772277627722772           | 1212               | 20830       | Show Genes |
| Gene Ontology | GO:0005488                            | binding                               | 9.43954474027195e-25  | -55.319795725219   | 12660         | 892                  | 0.758903401360544           | 1176               | 20347       | Show Genes |
| Gene Ontology | GO:0005730                            | nucleus                               | 5.91205125442094e-24  | -53.4850493780918  | 813           | 125                  | 0.103135313531353           | 1212               | 20830       | Show Genes |
| Gene Ontology | GO:0044464                            | cell part                             | 5.2815457378031e-23   | -51.2952383306056  | 15460         | 1037                 | 0.865510561056106           | 1212               | 20830       | Show Genes |
| Gene Ontology | GO:0005623                            | cell                                  | 6.338974990904402e-23 | -51.11274009568371 | 15495         | 1037                 | 0.865510561056106           | 1212               | 20830       | Show Genes |
| MSigDB        | GSE6674_ANTL_ICM_VS_CPG_STIM_BCELL_DN | GSE6674_ANTL_ICM_VS_CPG_STIM_BCELL_DN | 1.634864439029569e-21 | -47.9285448990668  | 186           | 95                   | 0.0507705255666364          | 1103               | 15729       | Show Genes |
| MSigDB        | KRIGE_RESPONSE_TO_TOSEDOSTAT_24HR_DN  | KRIGE_RESPONSE_TO_TOSEDOSTAT_24HR_DN  | 1.614455682388897e-21 | -47.6752883847299  | 865           | 140                  | 0.126926593916591           | 1103               | 15729       | Show Genes |
| Gene Ontology | GO:0043229                            | intracellular organelle               | 5.911065034341862e-21 | -46.6773111886208  | 11590         | 829                  | 0.683993399339934           | 1212               | 20830       | Show Genes |

In the enrichment report, the full list of functional terms are shown by order of p-value.

## 4.3.2 View Changed Genes from a Functional Term in Volcano Plot

From the bar chat, click a functional term, and you have the option to view these genes in a volcano plot.

2.View selected pathway in volcano plot

1.Click to select a pathway to view

Comparison: D108 vs D72

Up Regulated Genes

KEGG

| Pathway                    | log2(FC) | log10(P) |
|----------------------------|----------|----------|
| Lysosome                   | 44.08    | 11.00    |
| Focal adhesion             | 15.00    | 13.00    |
| Proteoglycans in cancer    | 13.39    | 11.00    |
| ECM-receptor interaction   | 11.00    | 10.37    |
| Autophagy - animal         | 10.00    | 10.00    |
| Apoptosis                  | 10.00    | 10.00    |
| Rheumatoid arthritis       | 8.28     | 8.44     |
| MAPK signaling pathway     | 8.28     | 8.03     |
| TNF signaling pathway      | 8.28     | 8.03     |
| PI3K-Akt signaling pathway | 8.28     | 8.03     |

Once you click the link in the popup window, volcano plot will be generated for the comparison with the changed genes from the selected term highlighted.

# Volcano Plot

[Back to Comparison Details](#)

Comparison Name:

Please enter the comparison id, e.g. GSE43696.GPL6480.test2.

Y-axis Statistics:  P-value  FDR Cutoff:

Fold Change Cutoff:

Chart Name:

Show Gene Symbol:  Auto (based on cutoff)  Customize

Genes: [Load from saved lists](#) [Load functional gene sets](#) [Clear](#)

Cd68

Cln5

Ctns

Ctsa

Ctsb

Ctsd

Ctsf

Ctsg

Ctsh

Ctsi

Ctsj

Ctsk

Ctsl

Ctsm

Ctsn

Ctso

Ctsp

Ctsq

Ctsr

Ctss

Ctst

Ctsu

Ctsv

Ctsw

Ctsx

Ctsy

Ctsz

Cts1

Cts2

Cts3

Cts4

Cts5

Cts6

Cts7

Cts8

Cts9

Cts10

Cts11

Cts12

Cts13

Cts14

Cts15

Cts16

Cts17

Cts18

Cts19

Cts20

Cts21

Cts22

Cts23

Cts24

Cts25

Cts26

Cts27

Cts28

Cts29

Cts30

Cts31

Cts32

Cts33

Cts34

Cts35

Cts36

Cts37

Cts38

Cts39

Cts40

Cts41

Cts42

Cts43

Cts44

Cts45

Cts46

Cts47

Cts48

Cts49

Cts50

Cts51

Cts52

Cts53

Cts54

Cts55

Cts56

Cts57

Cts58

Cts59

Cts60

Cts61

Cts62

Cts63

Cts64

Cts65

Cts66

Cts67

Cts68

Cts69

Cts70

Cts71

Cts72

Cts73

Cts74

Cts75

Cts76

Cts77

Cts78

Cts79

Cts80

Cts81

Cts82

Cts83

Cts84

Cts85

Cts86

Cts87

Cts88

Cts89

Cts90

Cts91

Cts92

Cts93

Cts94

Cts95

Cts96

Cts97

Cts98

Cts99

Cts100

Cts101

Cts102

Cts103

Cts104

Cts105

Cts106

Cts107

Cts108

Cts109

Cts110

Cts111

Cts112

Cts113

Cts114

Cts115

Cts116

Cts117

Cts118

Cts119

Cts120

Cts121

Cts122

Cts123

Cts124

Cts125

Cts126

Cts127

Cts128

Cts129

Cts130

Cts131

Cts132

Cts133

Cts134

Cts135

Cts136

Cts137

Cts138

Cts139

Cts140

Cts141

Cts142

Cts143

Cts144

Cts145

Cts146

Cts147

Cts148

Cts149

Cts150

Cts151

Cts152

Cts153

Cts154

Cts155

Cts156

Cts157

Cts158

Cts159

Cts160

Cts161

Cts162

Cts163

Cts164

Cts165

Cts166

Cts167

Cts168

Cts169

Cts170

Cts171

Cts172

Cts173

Cts174

Cts175

Cts176

Cts177

Cts178

Cts179

Cts180

Cts181

Cts182

Cts183

Cts184

Cts185

Cts186

Cts187

Cts188

Cts189

Cts190

Cts191

Cts192

Cts193

Cts194

Cts195

Cts196

Cts197

Cts198

Cts199

Cts200

Cts201

Cts202

Cts203

Cts204

Cts205

Cts206

Cts207

Cts208

Cts209

Cts210

Cts211

Cts212

Cts213

Cts214

Cts215

Cts216

Cts217

Cts218

Cts219

Cts220

Cts221

Cts222

Cts223

Cts224

Cts225

Cts226

Cts227

Cts228

Cts229

Cts230

Cts231

Cts232

Cts233

Cts234

Cts235

Cts236

Cts237

Cts238

Cts239

Cts240

Cts241

Cts242

Cts243

Cts244

Cts245

Cts246

Cts247

Cts248

Cts249

Cts250

Cts251

Cts252

Cts253

Cts254

Cts255

Cts256

Cts257

Cts258

Cts259

Cts260

Cts261

Cts262

Cts263

Cts264

Cts265

Cts266

Cts267

Cts268

Cts269

Cts270

Cts271

Cts272

Cts273

Cts274

Cts275

Cts276

Cts277

Cts278

Cts279

Cts280

Cts281

Cts282

Cts283



### 4.3.3 View Enriched Pathways Directly from Comparison Details

From the bar chart, if you are viewing KEGG or wikipathway database, clicking the pathway name and you have the option to view pathway plot.

The screenshot shows the CHOmics (v1) interface for comparison D108.vs.D72. The left sidebar has a 'KEGG' tab selected, highlighted by callout 1. The main area shows a bar chart of enriched KEGG pathways. The 'Lysosome' pathway is the most enriched, with approximately 45 genes. Callout 2 points to this pathway. A dropdown menu for 'Lysosome' is open, showing options: 'Volcano Plot', 'KEGG Pathway', and 'Save Gene List'. Callout 3 points to the 'KEGG Pathway' option.

This will automatically open the pathway visualization page, and preload the pathway and comparison. Click submit to view the pathway.

The screenshot shows the 'KEGG Pathway View' page in CHOmics (v1). The page title is 'KEGG Pathway View'. It includes a 'Start Over' button, a 'Download Pathway File' button, and a 'Search Pathways' button. The 'Comparisons' section shows 'D108.vs.D72' selected. There are fields for 'Or, upload your comparison files' and 'Visualization' (set to 'Gradient Blue-White-Red 1-0-1'). A 'Submit' button is at the bottom left.

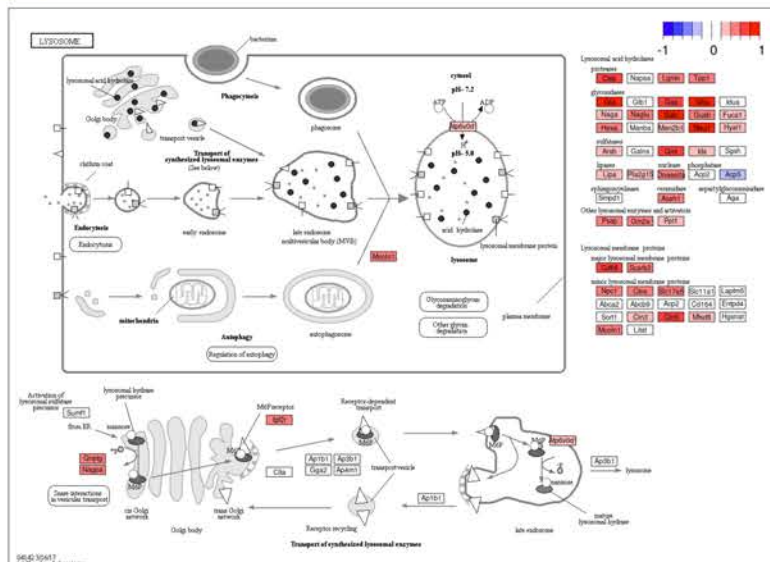

## Gene Set Enrichment from Ranked Genes

For each comparison, we produce a rank file for all genes using logFC. We use PAGE (Parametric Analysis of Gene Set Enrichment) to identify significant biological changes. PAGE can be more sensitive for comparisons where the logFC is relatively small, but most genes in a functional set show the same direction of change.

The predefined gene sets were from MSigDB.

For each comparison, the top up-regulated and down-regulated gene sets are plotted.

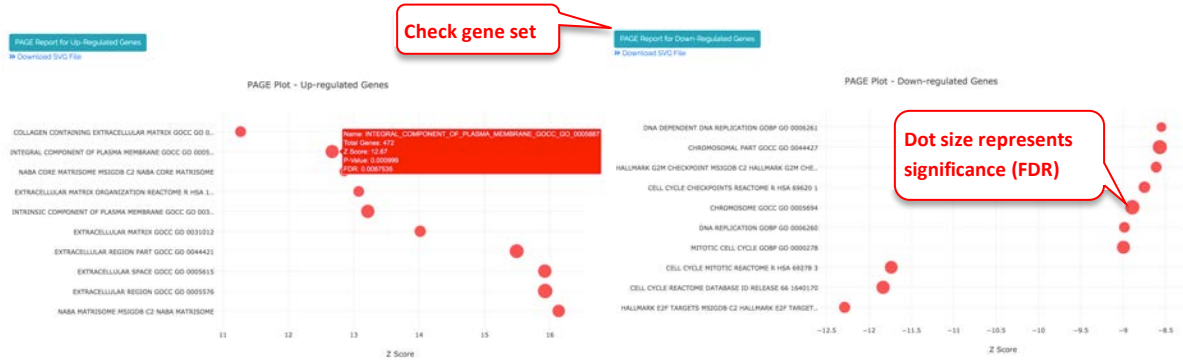

To view the full list of gene sets, you can click the report for genes as shown in following figure.

### UP-Regulated PAGE Report [Back to Comparison Details](#)

| Gene Set Name                                                                                                                             | # Genes | Z Score | P Value  | FDR       |
|-------------------------------------------------------------------------------------------------------------------------------------------|---------|---------|----------|-----------|
| A_TETRASACCHARIDE_LINKER_SEQUENCE_IS_REQUIRED_FOR_GAG_SYNTHESIS_REACTOME_R_HSA_1971475_1                                                  | 15      | 3.5026  | 0.000999 | 0.0087535 |
| ACTIN_BASED_CELL_PROJECTION_GOCC_GO_0098868                                                                                               | 123     | 3.8617  | 0.000999 | 0.0087535 |
| ACTIN_BINDING_GOMF_GO_0003779                                                                                                             | 256     | 4.1771  | 0.000999 | 0.0087535 |
| ACTIN_FILAMENT_BASED_PROCESS_GOBP_GO_0030029                                                                                              | 340     | 3.499   | 0.000999 | 0.0087535 |
| ACTION_POTENTIAL_GOBP_GO_0001608                                                                                                          | 39      | 5.7786  | 0.000999 | 0.0087535 |
| ACTIVATION_OF_IMMUNE_RESPONSE_GOBP_GO_0002253                                                                                             | 127     | 3.6063  | 0.000999 | 0.0087535 |
| ACTIVATION_OF_MATRIX_METALLOPROTEINASES_REACTOME_DATABASE_ID_RELEASE_66_1692389                                                           | 15      | 8.8731  | 0.000999 | 0.0087535 |
| ACTIVE_TRANSMEMBRANE_TRANSPORTER_ACTIVITY_GOMF_GO_0022804                                                                                 | 174     | 5.2286  | 0.000999 | 0.0087535 |
| ADAPTIVE_IMMUNE_RESPONSE_BASED_ON_SOMATIC_RECOMBINATION_OF_IMMUNE_RECEPTORS_BUILT_FROM_IMMUNOGLOBULIN_SUPERFAMILY_DOMAINS_GOBP_GO_0002480 | 83      | 3.3944  | 0.000999 | 0.0087535 |
| ADAPTIVE_IMMUNE_RESPONSE_GOBP_GO_0002250                                                                                                  | 124     | 3.7389  | 0.000999 | 0.0087535 |

Showing 1 to 10 of 1,000 entries

Previous 1 2 3 4 5 ... 100 Next

### 4.3.4 Multi-layer visualization

If you are interested in a particular pathway, sometimes it is useful to map the RNA-Seq or microarray data to the pathway for visualization.

1. Start here

2. Select pathway for visualization

My Experience

Private Folder: /opt/...

CHO Demo

2019-10-10  
Samples (15)  
Show/Hide Samples  
Analyses (1)  
Show/Hide Analyses  
• CHO Demo R

RNA-Seq Data

2019-10-08  
Samples (26)  
Show/Hide Samples  
Analyses (1)  
Show/Hide Analyses  
• Tests (✓ Finished)

My Private

CHO Demo - C

Created on 2019-10-10

There are 30 samples in this project.

There are 12 comparisons in this project.

3. Choose pathway

4. Choose comparison

5. (Optional) change visualization settings

6. Submit to view the pathway

CHOMics (v1) Toolbox My Analyses Admin Projects (1) Comparisons (12) Samples (30)

## KEGG Pathway View

Start Over Note: \* denotes required fields.

Glycolysis / Gluconeogenesis Pathway File

Comparisons: Load from saved lists Search and Select Select a Project Clear

D108.vs.D72

Or, upload your comparison files: Choose File No file chosen Demo Data

Visualization: Gradient Blue-White-Red (-1,0,1)

Submit

In the pathway plot, typically we use red-blue color scale to show the log2 Fold Change. Blue is down-regulated, red is up-regulated.

Color represents the significance of gene in the comparison

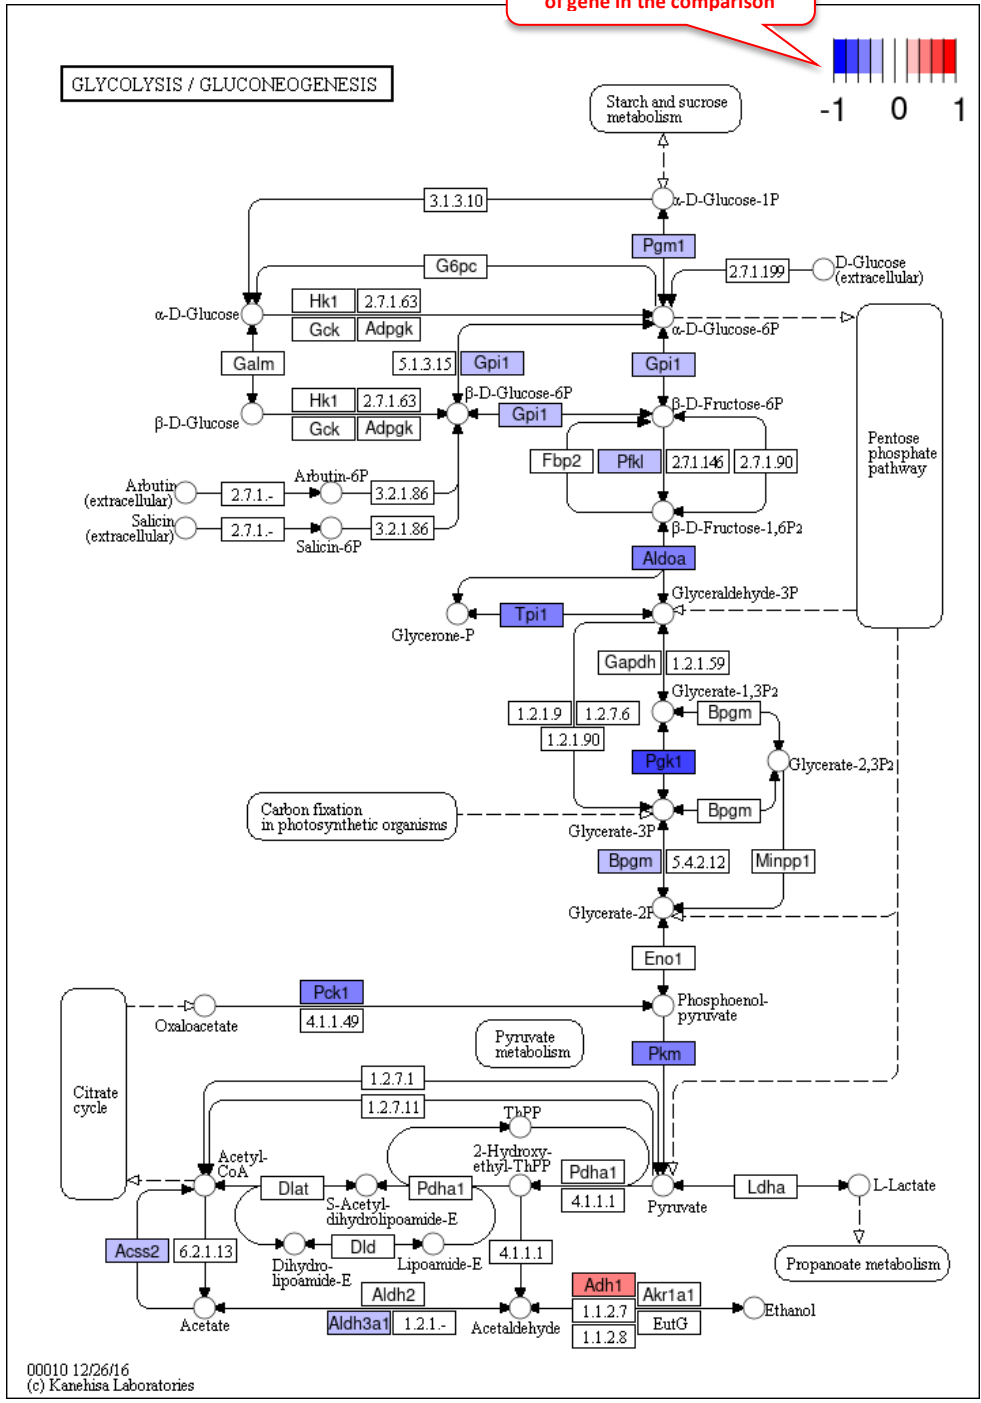

Pathway Plot from Several Comparisons

The user can add multiple comparisons from the pathway plot tool by clicking Add Comparison link. Besides showing log2 Fold Change, the user can also show statistical significance by clicking Enable Second Visualization Columns.

CHOMics (v1) Toolbox ▾ My Analyses ▾ Admin ▾ Projects (1) Comparisons (12) Samples (30)

## KEGG Pathway View

[Start Over](#) Note: \* denotes required fields.

Glycolysis / Gluconeogenesis [Download Pathway File](#)

[» Select Pathway](#)

Comparisons: [» Load from saved lists](#) [🔍 Search and Select](#) [🔍 Select a Project](#) [✕ Clear](#)

D84.vs.D72  
D108.vs.D72

**Choose multiple comparison**

Or, upload your comparison files:  No file chosen [» Demo Data](#)

Visualization:  
Gradient Blue-White-Red (-1,0,1)

The pathway plot will now have multiple color bars corresponding to the different comparisons.

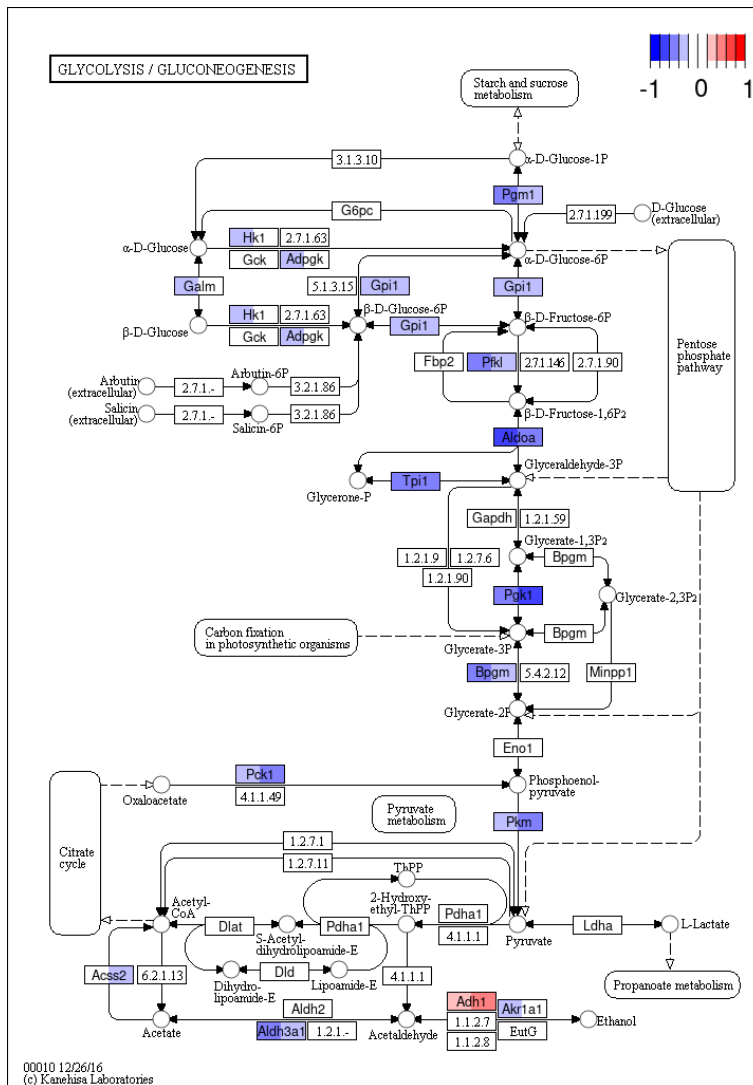

### 4.3.5 Pathway Heatmap From Comparisons

Users can display the enriched pathways from several related comparisons, and visualize the top enriched pathways across comparisons. Users can mix public data and inhouse comparisons.

The heatmap shows pathways in rows, comparisons in columns. The statistical significance is color-coded (log P-value, or Z-score). Pathways are sorted by the negative logP values from the highest to the lowest.

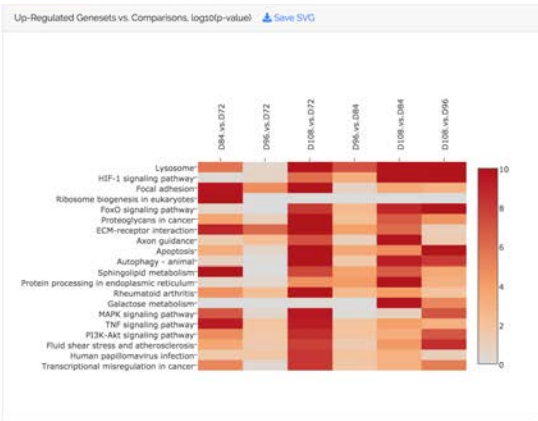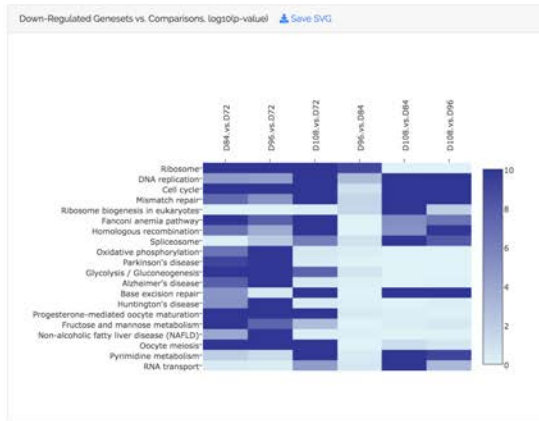

From the pathway heatmap, users can click any data point to view details.

CHOMics (v1) [Toolbox](#) [My Analyses](#) [Admin](#) [Projects \(1\)](#) [Comparisons \(12\)](#) [Samples \(30\)](#)

Pathway Names and GeneSets:  
Up-Regulated GeneSets

- Transcriptional misregulation in cancer
- Human papillomavirus infection
- Fluid shear stress and atherosclerosis
- P13K-Akt signaling pathway
- TNF signaling pathway
- MAPK signaling pathway
- Galactose metabolism
- Rheumatoid arthritis
- Protein processing in endoplasmic reticulum

[Draw Heatmap](#)

Up-Regulated GeneSets vs. Comparisons, log10(p-value) [Save SVG](#)

D84 vs. D72    D96 vs. D72    D108 vs. D72    D96 vs. D84    D108 vs. D84    D108 vs. D96

Lysosome  
HIF-1 signaling pathway  
Focal adhesion  
Ribosome biogenesis in eukaryotes  
FoxO signaling pathway  
Proteoglycans in cancer  
ECM-receptor interaction  
Axon guidance  
Apoptosis  
Autophagy - animal  
Sphingolipid metabolism  
Protein processing in endoplasmic reticulum  
Rheumatoid arthritis  
Galactose metabolism  
MAPK signaling pathway  
TNF signaling pathway  
P13K-Akt signaling pathway  
Fluid shear stress and atherosclerosis  
Human papillomavirus infection  
Transcriptional misregulation in cancer

**Data Actions**

- [View Comparison Detail](#)
- [View Data in Volcano Plot](#)

[Close](#)

x: D108 vs. D72  
y: Lysosome  
z: 44.082867304813  
logP: -44.0828673048135  
number of genes: 47

## 5 Customized analysis pipeline

### 5.1 Use alternative tool or algorithm

The analysis pipeline is modular, each step can be modified by users to use an alternative method if desired. The users should be familiar with the Linux bash to run the analysis steps and be familiar with php programming to make modification to the source code.

The full analysis pipeline has four steps, and each step is listed in a bash file in the analysis folder in the system.

- `step_0.sh` FASTQC of raw data
- `step_1.sh` Alignment to genome
- `step_2.sh` Gene count
- `step_3.sh` DEG detection and functional enrichment

These bash files are created by PHP programs `chomics/app/bxgenomics/bxgenomics_exe_analysis.php`, when users launch analysis pipeline online in a web browser via `chomics/app/bxgenomics/analysis.php`. For example, the current pipeline uses subread to perform alignment. If users want to modify the pipeline to change it to use the STAR program for alignment, they need the following steps:

- 1) Install STAR program on the server, prepare STAR index for the CHO genome.
- 2) Check the commands in `step_1.sh`, and change the commands as needed. In this case, the subread command (subunc step) needs to be replaced by the equivalent STAR command. Since STAR can sort the bam files, the samtools sort step can be omitted. Finally, the STAR output file is named as `SampleIDAligned.sortedByCoord.out.bam`, an extra step is needed to rename it to `SampleID.sorted.bam`, so `step2.sh` can output gene count files with the correct sample names.
- 3) Edit PHP program `chomics/app/bxgenomics/bxgenomics_exe_analysis.php`, find the part that generates `step_1.sh` (The section is marked as “Step 1. Alignment with Subread”), and then make changes accordingly.
- 4) Test the updated system to make sure it works as expected.
